1 Review

## 2 **Brain-Computer Interface Robotics for Hand Rehabilitation**

### 3 **After Stroke: A Systematic Review**

4 Paul Dominick E Baniqued<sup>1\*</sup>, Emily C Stanyer<sup>2</sup>, Muhammad Awais<sup>2</sup>, Ali Alazmani<sup>1</sup>, Andrew  
5 E Jackson<sup>1</sup>, Mark A Mon-Williams<sup>2</sup>, Faisal Mushtaq<sup>2</sup>, Raymond J Holt<sup>1</sup>

6

7 1 School of Mechanical Engineering, University of Leeds, LS2 9JT Leeds, United Kingdom

8 2 School of Psychology, University of Leeds, LS2 9JZ Leeds, United Kingdom

9

10 \*Correspondence: [mnpdeb@leeds.ac.uk](mailto:mnpdeb@leeds.ac.uk)

## 11 **Abstract**

12 **Background:** Electroencephalography-based brain-computer interfaces (BCI) that allow the  
13 control of robotic devices to support stroke patients during upper limb rehabilitation are  
14 increasingly popular. Hand rehabilitation is focused on improving dexterity and fine motor  
15 control and is a core approach for helping stroke survivors regain activities of daily living.  
16 This systematic review examines recent developments in BCI-robotic systems for hand  
17 rehabilitation and identifies evidence-based clinical studies on stroke patients.

18 **Methods:** A search for January 2010-October 2019 articles using Ovid MEDLINE, Embase,  
19 PEDro, PsycINFO, IEEE Xplore and Cochrane Library databases was performed. The  
20 selection criteria included BCI-hand robotic systems for rehabilitation in various  
21 development stages involving tests on healthy human subjects or stroke survivors. Data fields  
22 include those related to study design, participant characteristics, technical specifications of  
23 the system, and clinical outcome measures.

24 **Results:** 30 studies were identified as eligible for qualitative review and among these, 11  
25 studies involved testing a BCI-hand robot on chronic and subacute stroke patients.  
26 Statistically significant improvements in motor assessment scores relative to controls were  
27 observed for two BCI-hand robot interventions. The degree of robot control for the majority  
28 of studies was limited to triggering the device to perform grasping or pinching movements  
29 using motor imagery. Most employed a combination of kinaesthetic and visual response via  
30 the robotic device and display screen, respectively, to match feedback to motor imagery.

31 **Conclusion:** Most studies on BCI-robotic systems for hand rehabilitation report systems at  
32 prototype or pre-clinical stages of development. Some studies report statistically significant  
33 improvements in functional recovery after stroke, but there is a need to develop a standard  
34 protocol for assessing technical and clinical outcomes so that the necessary evidence base on  
35 efficiency and efficacy can be developed.

36

37 Keywords: brain-computer interface, electroencephalography, motor imagery, action

38 observation, robot-assisted rehabilitation, hand, wrist, stroke, therapy

39

## 40 **Background**

41 There is growing interest in the use of robotics within the field of rehabilitation. This interest  
42 is driven by the increasing number of people requiring rehabilitation following problems such

43 as stroke (with an ageing population), and the global phenomenon of insufficient numbers of  
44 therapists able to deliver rehabilitation exercises to patients [1,2]. Robotic systems allow a

45 therapist to prescribe exercises that can then be guided by the robot rather than the therapist.

46 An important principle within the use of such systems is that the robots assist the patient to  
47 actively undertake a prescribed movement rather than the patient's limb being moved

48 passively. This means that it is necessary for the system to sense when the patient is trying to  
49 generate the required movement (given that, by definition, the patient normally struggles with

50 the action). One potential solution to this issue is to use force sensors that can detect when the  
51 patient is starting to generate the movement (at which point the robot's motors can provide

52 assistive forces). It is also possible to use measures of muscle activation (EMGs) to detect the  
53 intent to move [3]. There is, however, growing interest in the potential of using measures of

54 brain activity to identify when a patient is trying to generate a movement- referred to as Brain  
55 Computer Interfaces, or BCIs. This interest in BCIs is motivated by idea that the

56 rehabilitation process can be enhanced by particular types of brain activity related to

57 imagining the movement [4]. There is a long history of using robotic devices for stroke

58 rehabilitation [5,6] and in the last decade, there has been a concerted effort by groups of

59 clinicians, neuroscientists and engineers to integrate these systems with incoming brain

60 signals to enhance the efficacy and effectiveness of stroke rehabilitation. The purpose of this

61 manuscript is to review the current state-of-the-art of existing brain-computer ‘closed loop’  
62 interfaces in terms of the technological readiness of existing systems, and the evidence for  
63 their clinical effectiveness.

64

65 BCIs allow brain state-dependent control of robotic devices to aid stroke patients during  
66 upper limb therapy and have been gaining research attention since their first implementation  
67 more than a decade ago [7,8]. Graimann et al. [4] defined a BCI as an artificial system that  
68 provides direct communication between the brain and a device based on the user’s intent;  
69 bypassing the normal efferent pathways of the body’s peripheral nervous system. A BCI  
70 recognises user intent by measuring brain activity and translating it into executable  
71 commands usually performed by a computer, hence the term “brain-computer interface”.

72

73 Most robotic devices used in upper limb rehabilitation exist in the form of exoskeletons or  
74 end-effectors. Robotic exoskeletons (i.e., powered orthoses, braces) are wearable devices  
75 where the actuators are biomechanically aligned with the wearer’s joints and linkages;  
76 allowing the additional torque to provide assistance, augmentation and even resistance during  
77 training [9]. In comparison, end-effector systems generate movement through applying forces  
78 to the most distal segment of the extremity via handles and attachments [9]. Rehabilitation  
79 robots are classified as Class II-B medical devices (i.e., a therapeutic device that administers  
80 the exchange of energy, mechanically, to a patient) and safety considerations are important  
81 during development [10,11]. Most commercial robots are focused on arms and legs, each  
82 offering a unique therapy methodology. There is also a category of device that target the hand  
83 and finger. Hand and finger rehabilitation are core component in regaining activities of daily  
84 living (ADL) as many ADLs require dexterous and fine motor movements (e.g. grasping and

85 pinching). Thus, the current review is focused on devices that have been designed specifically  
86 for wrist, hand and finger rehabilitation.

87

88 The potential of BCIs has gained considerable attraction because the neural activity involved  
89 in the control of the robotic device may be a key component in the rehabilitation itself. For  
90 example, mental rehearsal of movement is thought to activate some of the neural networks  
91 involved in movement execution (ME) [12–15]. The resulting rationale is that encouraging  
92 the use of motor imagery (MI) (i.e., the imagination of movement without execution) could  
93 increase the capacity of the motor cortex to control major muscle movements and decrease  
94 the necessity to use neural circuits damaged post-stroke. The scientific justification for this  
95 approach was first provided by Jeannerod [15] who suggested that the neural substrates of MI  
96 are part of a shared network that is also activated during the simulation of action by the  
97 observation of action (AO) [15]. These ‘mirror neuron’ systems are thought to be an  
98 important component of motor control and learning [15] - hence the belief that stimulating  
99 these systems could aid rehabilitation.

100

101 A recent meta-analysis of the neural correlates of action (MI, AO and ME) quantified  
102 ‘conjunct’ and ‘contrast’ networks in the cortical and subcortical regions [12]. This analysis,  
103 which took advantage of open-source historical data from fMRI studies, reported consistent  
104 activation in the premotor, parietal and somatosensory areas for MI, AO and ME. Predicated  
105 on such data, researchers have reasoned that stimulating MI should cause activation of the  
106 neural substrates that are also involved in controlling movement and there have been a  
107 number of research projects that have used AO in combination with MI in neurorehabilitation  
108 [16–18] and motor learning studies [19,20] over the last decade.

109

110 The strategy of BCI-robot systems in rehabilitation is to recognise the patient's intention to  
111 move or perform a task via an electroencephalography acquisition system [21], and then use  
112 the robotic device to provide assistive forces in a manner that mimics the actions of a  
113 therapist during standard therapy sessions [22]. The resulting feedback is patient-driven and  
114 is designed to aid in closing the neural loop from intention to execution. This process is said  
115 to promote use-dependent neuroplasticity within intact brain regions and relies on the  
116 repeated experience of initiating and achieving a specified target [23,24]; making the active  
117 participation of the patient in performing the therapy exercises an integral part of the motor  
118 re-learning process [25,26]. It is important to note that whilst the rationale underpinning the  
119 conjecture that BCI-robot systems could be useful in hand rehabilitation is reasonable, it is  
120 just a conjecture that requires empirical support.

121  
122 Electroencephalography (EEG) is currently the instrument of choice for data acquisition in  
123 BCI systems because it is non-invasive, easy to use and can detect relevant brain activity with  
124 high temporal resolution [27,28]. In principle, the recognition of MI activity via EEG can  
125 allow the control of a device independent of muscle activity [4]. It has been shown that MI-  
126 based BCI can discriminate motor intent by detecting event-related spectral perturbations  
127 (ERSP) [21,29] and/or event-related desynchronisation/synchronisation (ERD/ERS) patterns  
128 in the  $\mu$  (9-11 Hz) and  $\beta$  (14-30 Hz) sensorimotor rhythm of EEG signals [29]. However,  
129 EEG also brings with it some challenges- these neural markers are often concealed by various  
130 artefacts and may be difficult to recognise through the raw EEG signal alone. Thus, signal  
131 processing (via feature extraction and classification) is a vital part of obtaining a good MI  
132 signal for robotic control.

133

134 One implication of using MI and AO to justify the use of BCI approaches is that great care  
135 must be taken with regard to the quality of the environment in which the rehabilitation takes  
136 place. An important feature of MI is that, by definition, the patient must be able to imagine  
137 the movement. Likewise, AO requires the patients to clearly see the action. This suggests that  
138 the richness and vividness of the visual cues provided is an essential part of an effective BCI  
139 system. It is also reasonable to assume that feedback is important within these processes and  
140 thus the quality of feedback should be considered as essential. Finally, motivation is known  
141 to play an important role in promoting active participation during therapy [26,30]. Thus, a  
142 good BCI system should incorporate an approach (such as gaming and positive reward) that  
143 increases motivation. Recent advances in technology make it far easier to create a  
144 rehabilitation environment that provides rich vivid cues, gives salient feedback and is  
145 motivating. For example, the rise of immersive technologies, including virtual reality (VR)  
146 and augmented reality (AR) platforms [31,30,32], allows for the creation of engaging visual  
147 experiences that have the potential to improve a patient's self-efficacy [33] and thereby  
148 encourage the patient to maintain the rehabilitation regime. One specific example of this is  
149 visually amplifying the movement made by a patient when the movement is of limited extent  
150 so that the patient can see their efforts are producing results [34].

151

152 In this article, we review the development of BCI-robotic systems for hand rehabilitation and  
153 capture clinical studies involving stroke patients. Our goal was to address three critical  
154 questions for understanding the current value and potential of BCI-based robotic therapy:

155

156 (1) Identify how BCI technologies are being utilised in controlling robotic devices for  
157 hand rehabilitation. Our focus was on the study design and the tasks that are  
158 employed in setting up a BCI-hand robot therapy protocol.

159 (2) Document the state-of-art of BCI systems. Because BCI for rehabilitation is still an  
160 emerging field of research, we expected that most studies would be in their proof-of-  
161 concept or clinical testing stages of development. Our purpose was to determine the  
162 limits of this technology in terms of: (a) resolution of hand MI detection and (b) the  
163 degree of which we can have robotic control.

164 (3) Evaluate the clinical significance of BCI-hand robot systems by looking at the  
165 outcome measures in motor recovery and determine if a standard protocol exists for  
166 these interventions.

167

168 It is important to note that there have been several recent reviews exploring BCI for stroke  
169 rehabilitation. For example, Monge-Pereira et al. [35] compiled EEG-based BCI studies for  
170 upper limb stroke rehabilitation. Their systematic review (involving 13 clinical studies on  
171 stroke and hemiplegic patients) reported on research methodological quality and  
172 improvements in the motor abilities of stroke patients. Cervera et al. [36] performed a meta-  
173 analysis on the clinical effectiveness of BCI-based stroke therapy among 9 randomised  
174 clinical trials (RCT). McConnell et al. [37] reviewed and provided insights from a total of  
175 110 robotic devices with brain-machine interfaces for hand rehabilitation post-stroke. These  
176 reviews, in general, have reported that such systems provide improvements in both functional  
177 and clinical outcomes in pilot studies or trials involving small sample sizes. Thus, the  
178 literature indicates that EEG-based BCI are a promising general approach for rehabilitation  
179 post-stroke.

180

181 The current work complements these previous reports by focusing on a systematic review of  
182 the rehabilitation of the fine motor skills associated with hand movement, and profiling BCI-  
183 robot systems for the hands with their corresponding technical and clinical implementations.



## 184 **Methods**

### 185 **Protocol Registration**

186 Details of the protocol for this systematic review were registered on the International  
187 Prospective Register of Systematic Reviews (PROSPERO) and can be accessed at  
188 [www.crd.york.ac.uk/PROSPERO](http://www.crd.york.ac.uk/PROSPERO) (ID: CRD42018112107).

189

### 190 **Search Strategy and Eligibility**

191 An in-depth search of articles from January 2010 to October 2019 was performed on Ovid  
192 MEDLINE, Embase, PEDro, PsycINFO, IEEE Xplore and Cochrane Library. Only full-text  
193 articles published in English were selected for this review. Table 1 shows the combination of  
194 keywords used in the literature searching.

195

196

**Table 1. Keyword Combinations**

| Set 1 (OR)                   |     | Set 2 (OR)                    |     | Set 3 (OR)            |
|------------------------------|-----|-------------------------------|-----|-----------------------|
| Brain-computer interface/BCI |     | Stroke (rehabilitation/       |     | Robotic (exoskeleton/ |
| Electroencephalography/EEG   |     | therapy/treatment/recovery)   |     | orthosis)             |
| Brain-machine interface/BMI  |     | Motor (rehabilitation,        |     | Powered (exoskeleton/ |
| Neural control interface     | AND | therapy/treatment/recovery)   | AND | orthosis)             |
| Mind-machine interface       |     | Neurorehabilitation           |     | Robot                 |
|                              |     | Neurotherapy                  |     | Device                |
|                              |     | Hand (rehabilitation/therapy/ |     |                       |
|                              |     | recovery/exercises/movement)  |     |                       |

197

198 The inclusion criteria for the articles were: (1) publications that reported the development of  
199 an EEG-based BCI; (2) studies targeted towards the rehabilitation of the hand after stroke; (3)  
200 studies that involved the use of BCI and a robotic device (e.g., exoskeleton, end-effector type,  
201 platform-types, etc.); (4) studies that performed a pilot test on healthy human subjects or a  
202 clinical trial with stroke patients. The articles were also screened for the following exclusion

203 criteria: (1) studies that targeted neurological diseases other than stroke; (2) studies that used  
204 other intention sensing mechanisms (electromyography/EMG, electrooculography/EOG, non-  
205 paretic hand, other body parts, etc.).

206

207 Two authors performed independent screenings of titles and abstracts based on the inclusion  
208 and exclusion criteria. The use of a third reviewer was planned a priori in cases where a lack  
209 of consensus existed around eligibility. However, consensus was achieved from the first two  
210 authors during this stage. Full-text articles were then obtained, and a second screening was  
211 performed until a final list of studies was agreed to be included for data extraction.

212

### 213 **Data Extraction**

214 The general characteristics of the study and their corresponding results were extracted from  
215 the full-text articles by the reviewers following the Preferred Reporting Items for Systematic  
216 Reviews and Meta-Analysis (PRISMA) checklist. Data fields included those related to study  
217 design, participant characteristics, technical specifications of the system, and technical and  
218 experimental results. For studies involving stroke patients, clinical outcomes were obtained  
219 based on muscle improvement measures such as Fugl-Meyer Motor Assessment (FMMA)  
220 scores [38], Action Research Arm Test (ARAT) scores [39], United Kingdom Medical  
221 Research Council (UK-MRC) muscle grade [40], Grip Strength (GS) Test and Pinch Strength  
222 (PS) Test scores (i.e., kilogram force collected using an electronic hand dynamometer)  
223 among others.

## 224 **Quality Assessment**

### 225 *Technological Readiness*

226 We first assessed the development stages of the systems used in the studies extracted. By  
227 performing a Technological Readiness Assessment (TRA), we were able to determine the  
228 maturity of the systems via a Technology Readiness Level (TRL) scale of 1-9 and quantify its  
229 implementation in a research or clinical setting. Since a BCI-robot for rehabilitation can be  
230 categorised as a Class II-B medical device we have adapted a customised TRL scale to  
231 account for these requirements [41].

232

### 233 *Clinical Use*

234 A methodological quality assessment was also performed for clinical studies based on the  
235 Physiotherapy Evidence Database (PEDro) Scale [42]. This scale evaluates studies with a  
236 checklist of 11 items based on experts' consensus criteria in physiotherapy practice. The  
237 complete details of the criteria can be found online [43]. A higher score in the PEDro scale (6  
238 and above) implied better methodological quality but are not used as a measure of validity in  
239 terms of clinical outcomes. Pre-defined scores from this scale were already present in studies  
240 appearing in the PEDro search. However, studies without PEDro scores or are not present in  
241 the PEDro database at all had to be manually evaluated by the authors against the 11-item  
242 checklist (five of seven studies).

## 243 Results

### 244 Search Results

245 Figure 1 shows the study selection process and the number of articles obtained at each stage.

246

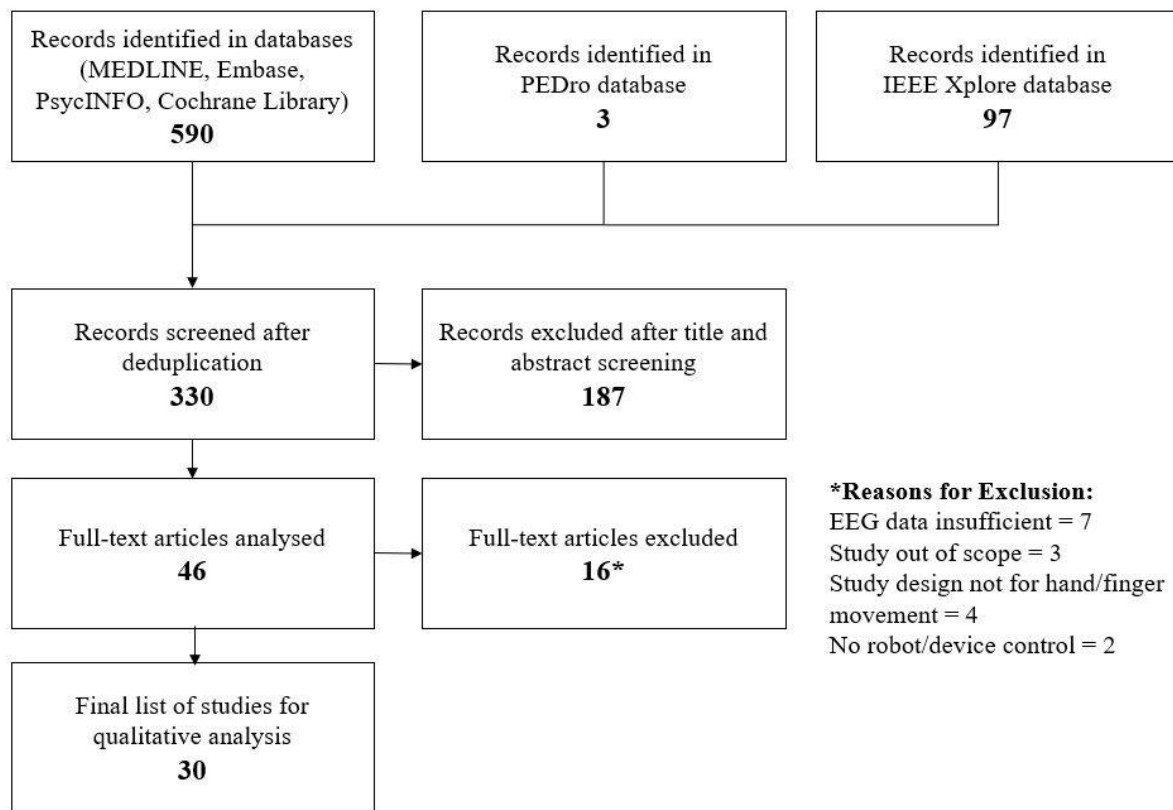

247

248 **Figure 1. Study Selection Flowchart**

249

250 A total of 590 studies were initially identified. After deduplication, 330 studies underwent  
251 title and abstract screening. Forty six studies passed this stage and among these, 16 were  
252 removed after full-text screening due to the following reasons: insufficient EEG and robotic  
253 data [44–50], the study was out of scope [51–53], the study design was not for hand/finger  
254 movement [54–57], no robot or mechatronic device was involved in the study [58,59]. A final  
255 list with 30 studies was identified as eligible for qualitative review. Among the 30 studies, 11  
256 [60–70] were involved in testing the BCI-hand robot system on chronic and subacute stroke

257 patients ([60,65] are RCTs) while the rest involved testing on healthy participants [71–89].

258 Table 2 shows a summary of the relevant data fields extracted from these studies.

259

260 **[Table 2 Around Here]**

261

## 262 **Technology Evaluation**

### 263 *EEG Acquisition*

264 The choice of EEG system as well as the type of electrodes provides a technical trade-off and  
265 affects the session both in terms of subjective experiences (i.e., ease-of-use, preparation time,  
266 cleaning, comfortability) and data performance. Due to the presence of a conducting  
267 gel/solution, standard “wet” electrodes provide a degree of confidence in preventing signal  
268 disruption within a short duration usually enough for a standard stroke therapy session.  
269 However, this also makes the setup, use and cleaning in the experiment more challenging, non-  
270 ambulatory and reliant on a specialised laboratory setup [4]. Conversely, dry electrodes offer  
271 an accessible, user-friendly and portable alternative by using dry metal pins or coatings that  
272 comb through hair and come in contact directly with the scalp. The signal fidelity of dry  
273 electrodes is still a matter of debate in the BCI community. A systematic comparison between  
274 dry passively-amplified and wet actively-amplified electrodes reported similar performance in  
275 the detection of event-related potentials (ERP) [90]. However, for a study involving dry active  
276 electrodes [91], high inter-electrode impedance resulted in increased single-trial and average  
277 noise levels as compared to both active and passive wet electrodes. In classifying MI,  
278 movement-related artefacts adversely affect active dry electrodes, but these can be addressed  
279 through a hybrid system of other physiological sensors to separate sources [92].

280

281 The EEG acquisition systems involved in the studies ranged from low-cost devices having few  
282 electrode channels (2-15 gel or saline-soaked silver/silver chloride [Ag/AgCl] electrodes) to  
283 standard EEG caps that had higher spatial resolution (16-256 gel or saline-soaked Ag/AgCl  
284 electrodes). The placement of EEG channels was accounted for by studies involving MI  
285 (N=21). This allowed us to determine the usage frequency among electrodes and is presented  
286 in Figure 2 as a heat map generated in R Studio (using the packages: “akima”, “ggplot2” and  
287 “reshape2”) against the 10-20 international electrode placement system.  
288

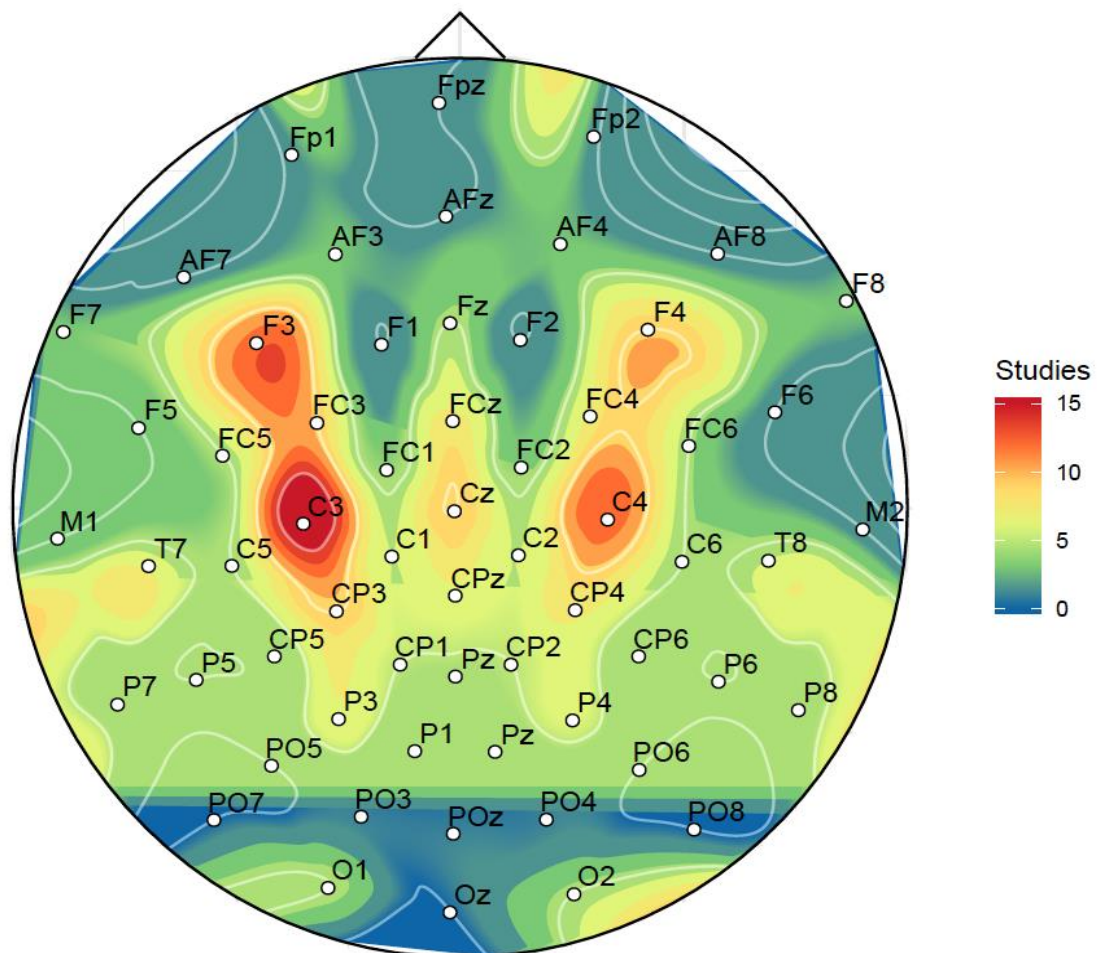

289  
290 **Figure 2. EEG Channel Usage across Motor Imagery Studies (N=21)**  
291

292 It can be seen that the EEG channels used for MI studies are concentrated towards electrodes  
293 along the central sulcus (C) region and the frontal lobe (F) region of the placement system  
294 where the motor cortex strip lies. Among these, C3 (N=17) and F3 (N=14) were mostly used,  
295 presumably because a majority of the participants were right-handed. The next most frequent  
296 were C4 (N=13) and the electrodes F4, Cz and CP3 (N=10).

297

### 298 *Signal Processing: Feature Extraction and Classification*

299 It is necessary to process EEG data if they are to be used as a control signal. First, the data  
300 need to undergo a series of pre-processing routines (e.g., filtering and artefact removal)

301 before feature extraction and classification for use as a control signal for the robotic hand.

302 Feature extraction involves recognising useful information (e.g., spectral power, time epochs,  
303 spatial filtering) for better discriminability among mental states. For example, the common  
304 spatial patterns (CSP) algorithm is a type of spatial filter that learns and maximises the  
305 variance of band pass-filtered EEG from one class to discriminate it to the other [93].

306

307 In the EEG-based BCI studies examined, it was found that the feature extraction and  
308 classification techniques were variable between systems. Table 3 provides a summary of pre-  
309 processing, feature extraction and classification techniques across the studies. There was a  
310 wide variation in the implemented signal processing strategies, but a unifying theme across  
311 studies was the attempt to: (i) discriminate mental states recorded in EEG across different  
312 manual tasks; (ii) classify the different states to produce a viable signal.

313

314 **Table 3. BCI Feature Extraction and Classification**

| Study           | Pre-Processing            | Feature Extraction                    | Classification                     | Hand Task  |
|-----------------|---------------------------|---------------------------------------|------------------------------------|------------|
| Ang et al. [60] | Band-pass<br>(0.05-40 Hz) | Filter Bank Common<br>Spatial Pattern | Calibration model<br>(unspecified) | MI vs rest |

|                               |                                                                                 | (FBCSP) algorithm<br>[94]                                               |                                                                                   |                                   |
|-------------------------------|---------------------------------------------------------------------------------|-------------------------------------------------------------------------|-----------------------------------------------------------------------------------|-----------------------------------|
| Barsotti et al. [61]          | Band-pass (8-24 Hz)                                                             | ERD ( $\beta$ and $\mu$ -decrease), CSP                                 | SVM with linear kernel                                                            | MI vs rest                        |
| Bauer et al. [82]             | Band-pass (6-16 Hz using zero-phase lag FIR)                                    | ERD ( $\beta$ -decrease)                                                | Linear autoregressive model based on Burg Algorithm                               | MI vs rest                        |
| Bundy et al. [62]             | Unspecified                                                                     | ERD ( $\beta$ and $\mu$ -decrease)                                      | Linear autoregressive model                                                       | MI (affected, unaffected) vs rest |
| Chowdhury et al. [63]         | Band-pass (0.1 Hz-100 Hz), Notch (50 Hz)                                        | CSP Covariance-based, ERD/ERS ( $\beta$ and $\mu$ -change)              | SVM with linear kernel, Covariate Shift Detection (CSD)-based Adaptive Classifier | left vs right MI                  |
| Coffey et al. [77]            | Band-pass (0.5 Hz-30 Hz), Notch (50 Hz)                                         | CSP Covariance-based                                                    | Linear Discriminant Analysis (LDA) classifier                                     | MI vs rest                        |
| Diab et al. [88]              | Unspecified                                                                     | Time epochs (unspecified)                                               | Artificial Neural Network (ANN)-based Feed Forward Back Propagation               | Non-MI open vs closed             |
| Frolov al. [65]               | Band-pass (5-30 Hz), FIR (order 101), IIR notch Chebyshev type I filter (50 Hz) | Time epochs (10 s)                                                      | Bayesian-based EEG covariance classifier [95]                                     | MI (affected, unaffected) vs rest |
| Ono et al. [66]               | Band-pass (0.5-30 Hz), notch (50 or 60 Hz)                                      | Time epochs (700 ms), ERD ( $\mu$ -decrease)                            | Linear Discriminant Analysis (LDA) classifier                                     | MI vs rest                        |
| Ramos-Murguialday et al. [80] | Unspecified                                                                     | Time epochs (5 s), Spatial filter, ERD/ERS ( $\beta$ and $\mu$ -change) | Linear autoregressive model                                                       | MI vs rest                        |
| Vukelic and Gharabaghi [84]   | High-pass (unspecified)                                                         | ERD ( $\beta$ -decrease)                                                | Linear autoregressive model based on Burg Algorithm                               | MI vs rest                        |
| Witkowski et al. [86]         | Band-pass (0.4-70 Hz), Laplacian filter                                         | ERD/ERS ( $\beta$ and $\mu$ -change)                                    | Linear autoregressive model based on Yule-Walker algorithm                        | MI vs rest                        |

315

316

SVM = Support Vector Machines, FIR = Finite Impulse Response, IIR = Infinite Impulse Response



317

318 *Robot-Assisted Rehabilitation*

319 Robotic hand rehabilitation systems provide kinaesthetic feedback to the user during BCI trials.  
320 Most of these devices are powered by either DC motors, servomotors or pneumatic actuators  
321 that transmit energy via rigid links or Bowden cables in a tendon-like fashion. The studies in  
322 this review included single-finger [69–71], multi-finger [67] (including EMOHEX [63,64,72]),  
323 full hand gloves [73,74] (including mano: Hand Exoskeleton [75] and Gloreha [76]) and full  
324 arm exoskeletons with isolated finger actuation (BRAVO-Hand [61]). Nine of the studies  
325 [62,72,73,75,77–81] presented their novel design of a hand rehabilitation device within the  
326 article while some reported on devices reported elsewhere (i.e., in a previous study of the group  
327 or a research collaborator). Two commercially-available devices were also used: AMADEO  
328 (Tyromotion, Austria) is an end-effector device used in 3 studies [82–84], and Gloreha  
329 (Idrogenet, Italy) is a full robotic hand glove used by Tacchino et al. [76]. AMADEO and  
330 Gloreha are both rehabilitation devices that have passed regulatory standards in their respective  
331 regions. AMADEO remains the gold standard for hand rehabilitation devices as it has passed  
332 safety and risk assessments and provided favourable rehabilitation outcomes. The International  
333 Classification of Functioning, Disability and Health (ICF) provides three specific domains that  
334 can be used to assess an intervention of this kind: improving impairments, supporting  
335 performance of activities and promoting participation [96,97]. In this case, a gold standard  
336 device not only prioritises user safety (established early in the development process) but also  
337 delivers favourable outcomes in scales against these domains. Figure 3 shows the main types  
338 of robotic hand rehabilitation devices.

339

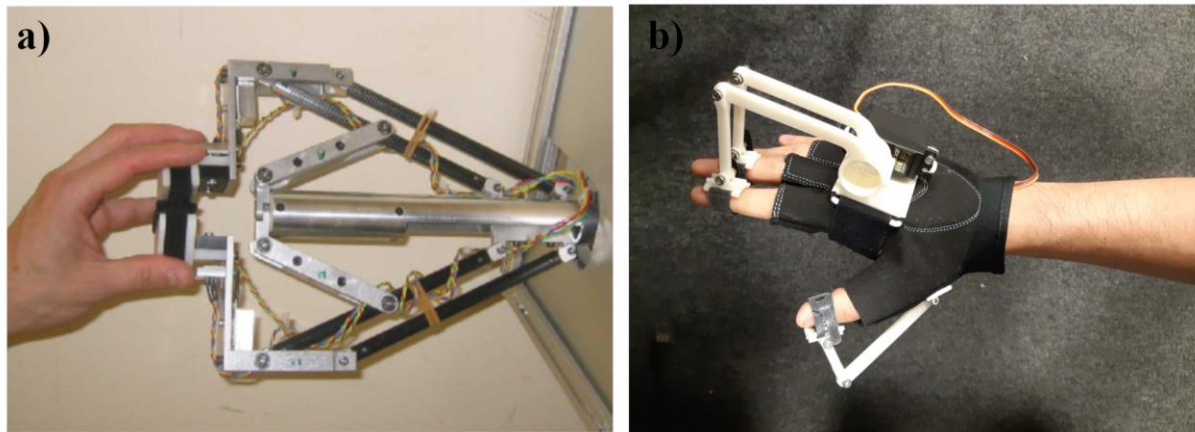

340

341 **Figure 3. Robotic hand rehabilitation devices: a) An end-effector device (Haptic Knob)**  
342 **used in one of the extracted studies [60,98], b) a wearable hand exoskeleton/orthosis**  
343

344 *Quality Assessment*

345 A Technology Readiness Assessment (TRA) was performed for each study and the  
346 Technology Readiness Levels (TRL) are presented in Table 4. While some of the system  
347 components (especially among robotic devices) were commercially available (having TRL  
348 9+), we performed a TRA on the whole system (the interaction between BCI and robotics) to  
349 provide an evaluation of its maturity and state-of-the-art development with regard to  
350 rehabilitation medicine. We further assessed the TRL of each system at the time of the  
351 publication and its subsequent development.

352

353 **Table 4. Technology Readiness Assessment of the BCI-Hand Robot Systems**

| Levels | Description                                                                                                                                                                                            | Studies |
|--------|--------------------------------------------------------------------------------------------------------------------------------------------------------------------------------------------------------|---------|
| TRL 1  | <ul style="list-style-type: none"><li>• Lowest level of technological readiness</li><li>• Literature reviews and initial market surveys</li><li>• Scientific application to defined problems</li></ul> |         |
| TRL 2  | <ul style="list-style-type: none"><li>• Generation of hypotheses</li><li>• Development of research plans and/or protocols</li></ul>                                                                    |         |

|       |                                                                                                                                                                                                                                                                                                        |                                                                                                                   |
|-------|--------------------------------------------------------------------------------------------------------------------------------------------------------------------------------------------------------------------------------------------------------------------------------------------------------|-------------------------------------------------------------------------------------------------------------------|
| TRL 3 | <ul style="list-style-type: none"> <li>• Testing of hypotheses – basic research, data collection and analysis</li> <li>• Testing of design/prototype – verification and critical component specifications</li> <li>• Initial proof-of-concept in limited amount of laboratory/animal models</li> </ul> | Most studies from the prototype group (N=18) [71–87,89]                                                           |
| TRL 4 | <ul style="list-style-type: none"> <li>• Proof-of-concept of device/system in defined laboratory/animal models</li> <li>• Safety testing – problems, adverse events and potential side effects</li> </ul>                                                                                              | Witkowski et al., 2014 [88]                                                                                       |
| TRL 5 | <ul style="list-style-type: none"> <li>• Comparison of device/system to other existing modalities or equivalent devices/systems</li> <li>• Further development – testing through simulation (tissue or organ models), animal testing</li> <li>• Drafting of Product Development Plan</li> </ul>        | Barsotti et al., 2015 [61], Ono et al., 2016 [66], Chowdhury et al., 2018-b [63], Tsuchimoto et al., 2019 [69]    |
| TRL 6 | <ul style="list-style-type: none"> <li>• Small scale clinical trials (Phase 1) – under carefully controlled and intensely monitored clinical conditions</li> </ul>                                                                                                                                     | Carino-Escobar et al., 2019 [70], Chowdhury et al., 2018-c [64], Norman et al., 2018 [67], Wang et al., 2018 [68] |
| TRL 7 | <ul style="list-style-type: none"> <li>• Clinical trials (Phase 2) – safety and effectiveness integration in operational environment</li> </ul>                                                                                                                                                        | Ang et al., 2014 [60], Frolov et al., 2017 [65]                                                                   |
| TRL 8 | <ul style="list-style-type: none"> <li>• Clinical trials (Phase 3) – evaluation of overall risk-benefit of device/system use</li> <li>• Confirmation of QSR compliance</li> <li>• Awarding of PMA for device/system by CDRH or equivalent agency</li> </ul>                                            |                                                                                                                   |
| TRL 9 | <ul style="list-style-type: none"> <li>• The device/system may be distributed/marketed</li> </ul>                                                                                                                                                                                                      |                                                                                                                   |

354

355

356

---

QSR = Quality System Requirements, PMA = Premarket Approval, CDRH = Center for Devices and Radiological Health

## 357 **Clinical Evaluation**

### 358 *Studies with Stroke Patients (Clinical Group)*

359 A total of 208 stroke patients (with sample size varying 3-74) were involved in the 11 clinical  
360 studies. One study [60] reported a 3-armed RCT with control groups as device-only and SAT  
361 while another study [65] was a multi-centre RCT with sham as the control group. Five studies  
362 were uncontrolled – where the aims were either to study classification accuracies during  
363 sessions [61], to monitor clinical outcomes improvement from Day 0 until the end of the  
364 programme [62,70] or both [64,67]. Two studies [68,69] compared effects of the intervention  
365 against SHAM feedback. Another study [63] compared the classification accuracies of  
366 healthy and hemiplegic stroke patients against two BCI classifiers while the remaining study  
367 [66] compared classification accuracies from stroke patients who receive congruent or  
368 incongruent visual and kinaesthetic feedback.

369

370 Most of the studies adopted FMMA, ARAT and GS measurements to assess clinical  
371 outcomes. Six studies [60,62,64,65,68,70] reported patient improvement in these measures  
372 when subjected to BCI-hand robot interventions; in contrast with their respective controls or  
373 as recorded through time in the programme. For Ang et al. [60], FMMA Distal scores were  
374 reported in weeks 3, 6, 12 and 24 and the BCI-device group (N=6) yielded the highest  
375 improvement in scores across all time points as compared to the device only (N=8) and SAT  
376 (N=7) groups. Bundy et al. [62] reported an average of  $6.20 \pm 3.81$  improvement in the ARAT  
377 scores of its participants (N=10) in the span of 12 weeks while Chowdhury et al. [64]  
378 reported a group mean difference of +6.38 kg ( $p=0.06$ ) and +5.66 ( $p<0.05$ ) in GS and ARAT  
379 scores, respectively (N=4). Frolov et al.'s [65] multi-centre RCT reported a higher  
380 improvement in the FMMA Distal, ARAT Grasp and ARAT Pinch scores of the BCI-device  
381 group (N=55) when compared to the control/SHAM group (N=19), but not in the ARAT Grip

382 scores where the values are both equal to 1.0 with  $p < 0.01$  for the BCI-device group and  
383  $p = 0.045$  for the control.

384

#### 385 *Studies with Healthy Participants (Prototype Group)*

386 The studies which involved pilot testing on healthy human participants had a combined total  
387 of individuals (sample size ranging from 1-32) who had no history of stroke or other  
388 neurological diseases. Right-handed individuals made up 44.24% of the combined population  
389 while the other 55.76% were unreported. These studies aimed to report the successful  
390 implementation of a BCI-robot system for hand rehabilitation and were more heterogeneous  
391 in terms of study and task designs than those studies that involved clinical testing. The most  
392 common approach was to design and implement a hand orthosis controlled by MI which  
393 accounted for 9 out of the 19 studies and were measured based on classification accuracy  
394 during the calibration/training period and online testing. Li et al. [73] and Stan et al. [79] also  
395 aimed to trigger a hand orthosis but instead of MI, the triggers used by Li et al. is based on an  
396 attention threshold while Stan et al. used a vision-based P300 speller BCI. Bauer et al. [82]  
397 compared MI against ME using a BCI-device while Ono et al. [85] studied the  
398 implementation of an action observation strategy with a combined visual and kinaesthetic  
399 feedback or auditory feedback. Five more studies [76,80,81,83,84] focused on varying the  
400 feedback while two more [74,86] assessed the performance and safety of a hybrid BCI with  
401 EMG, EOG or both.

402

403 For the studies that had a clinical testing component, a methodological quality assessment by  
404 the PEDro Scale was performed. Two studies which appeared on the PEDro search [60,65]  
405 had predetermined scores in the scale and were extracted for this part while the rest were  
406 manually evaluated by the authors. Table 5 shows the results of the methodological quality

407 assessment against the scale. Note that in the PEDro Scale, the presence of an eligibility  
408 criteria is not included in the final score.

409

410 **Table 5. Methodological Quality of Clinical Studies based on PEDro Scale**

| Criteria     |                                 | Ang et al. | Barsotti et al. | Bundy et al. | Carino-Escobar et al. | Chowdhury-b | Chowdhury-c | Frolov et al. | Norman et al. | Ono et al. | Tsuchimoto et al. | Wang et al. |
|--------------|---------------------------------|------------|-----------------|--------------|-----------------------|-------------|-------------|---------------|---------------|------------|-------------------|-------------|
| 1            | Eligibility criteria*           | 1          | 1               | 1            | 1                     | 1           | 1           | 1             | 1             | 0          | 1                 | 1           |
| 2            | Random allocation               | 1          | 0               | 0            | 0                     | 0           | 0           | 1             | 0             | 0          | 1                 | 1           |
| 3            | Concealed allocation            | 0          | 0               | 0            | 0                     | 0           | 0           | 0             | 0             | 0          | 1                 | 1           |
| 4            | Baseline comparability          | 1          | 0               | 1            | 0                     | 1           | 1           | 1             | 0             | 0          | 0                 | 0           |
| 5            | Blind subjects                  | 0          | 0               | 0            | 0                     | 0           | 0           | 0             | 0             | 0          | 1                 | 1           |
| 6            | Blind therapists                | 0          | 0               | 0            | 0                     | 0           | 0           | 0             | 0             | 0          | 1                 | 0           |
| 7            | Blind assessors                 | 1          | 0               | 0            | 0                     | 0           | 0           | 1             | 0             | 0          | 0                 | 1           |
| 8            | Adequate follow-up              | 1          | 1               | 1            | 1                     | 1           | 1           | 0             | 1             | 1          | 1                 | 1           |
| 9            | Intention-to-treat analysis     | 0          | 0               | 1            | 1                     | 1           | 1           | 0             | 1             | 0          | 0                 | 0           |
| 10           | Between-group comparisons       | 1          | 0               | 0            | 0                     | 1           | 0           | 1             | 0             | 1          | 1                 | 1           |
| 11           | Point estimates and variability | 1          | 1               | 1            | 1                     | 1           | 0           | 1             | 1             | 1          | 1                 | 1           |
| <b>Total</b> |                                 | <b>6</b>   | <b>2</b>        | <b>4</b>     | <b>4</b>              | <b>5</b>    | <b>3</b>    | <b>5</b>      | <b>4</b>      | <b>3</b>   | <b>7</b>          | <b>7</b>    |

411

412

\*not included in the final score

## 413 **Discussion**

414 To the best of our knowledge, this article was the first to compile BCI-driven robotic systems  
415 specific for hand rehabilitation. During this review, we found several limitations present  
416 among the studies collected and we examine these in more detail here and provide  
417 recommendations for future work in this area.

418  
419 To provide clarity on the state-of-the-art and development of BCI-hand robot systems, we  
420 looked into the maturity of technology used in each study and determined by its readiness  
421 level (TRL). All but one in the prototype group was rated as having TRL 3 while the clinical  
422 group was more varied in their TRL (ranging from 5-7). The system used by Witkowski et al.  
423 [86], a prototype study, was rated TRL 4 due to the study being performed on the basis of  
424 improving and assessing its safety features. It is also worth noting that while a formal safety  
425 assessment was not performed for the TRL 3 prototypes of Stan et al. [79], Randazzo et al.  
426 [75] and Tacchino et al. [76], safety considerations and/or implementations were made; a  
427 criterion to be satisfied before proceeding to TRL 4. The system used by Chowdhury et al. is  
428 a good example of improving a TRL from 5 to 6 with a pilot clinical study published within  
429 the same year [63,64]. The two systems used in the RCT studies by Ang et al. [60] and  
430 Frolov et al. [65] achieved the highest score (TRL 7) among all of the studies which also  
431 meant that no BCI-hand robot system for stroke rehabilitation has ever been registered and  
432 commercially-released to date. This suggests that such systems lack the strong evidence that  
433 would propel commercialisation and technology adoption.

434  
435 Heterogeneity in the study designs was apparent in both the clinical and prototype groups.  
436 The lack of control groups and random allocation in clinical studies (e.g., only 2 out of 7  
437 studies are in the huge sample size RCT stage) made us unable to perform a meta-analysis of

438 effects and continue the study by Cervera et al [36] with a focus on BCI-hand robot  
439 interventions. Results from the methodological quality assessment showed that only two  
440 studies [68,69] had a score of 7 in the PEDro scale. Although non-conclusive, these results  
441 support the notion that most of the studies are not aligned with the criteria of high-quality  
442 evidence-based interventions. These factors also raise the need to develop clearly defined  
443 protocols when conducting BCI-hand robot studies on stroke patients. Until new systems  
444 have been assessed on this standard, it will be difficult to generate strong evidence supporting  
445 the effectiveness of BCI-robotic devices for hand rehabilitation.

446

447 In the development of any BCI-robotic device there are several design and feature  
448 considerations that need to be made to ensure that the systems are both fit for purpose and  
449 acceptable to the end-user. These design considerations must go beyond the scope of  
450 understanding the anatomy of the hand and the physiology of motor recovery in response to  
451 therapy. Feedback from stroke patients should be an essential part of this design process. the  
452 extracted studies, we surveyed the extent of end-user involvement in the initial stages of  
453 development (i.e., through consultations, interviews and therapy observations) and we found  
454 that there were no explicit statements about these in the reports. We recommend, as good  
455 practice, for future work in this area to report the type and degree of patient and/or physician  
456 involvement in device development to allow reviewers and readers to more readily gauge the  
457 potential usability of the system.

458

459 We were able to profile the BCI-hand robot systems regarding their technical specifications  
460 and design features. In hardware terms, a BCI-hand robot system involves three major  
461 components: (1) An EEG data acquisition system with several electrodes connected to a  
462 signal amplifier; (2) A computer where raw EEG data is received then processed by filters



463 and classifiers and where most of the cues and feedback during training is presented via a  
464 visual display; (3) a robotic hand rehabilitation system for providing the physical therapy  
465 back to the user.

466

467 The majority of the studies (N=19) used a BCI solely based on EEG while the rest were  
468 combined with other sensors: EEG with EMG [60,63,72,76,80–83], EEG with force sensors  
469 [64] and an EEG-EMG-EOG hybrid system [74,86]. The purpose of this integration is mainly  
470 to improve signal quality by accounting for artefacts or to provide added modalities. Action  
471 potentials such as those caused by ocular and facial movements interfere with nearby  
472 electrodes and the presence of an added electrophysiological sensor accounting for these  
473 would enable the technician to perform noise cancellation techniques as a first step in signal  
474 processing. Almost all of the studies included used a standard EEG system with “wet”  
475 electrodes (e.g., g.USBamp by g.tec and BrainAmp by Brain Products) while three used  
476 Emotiv EPOC+, a semi-dry EEG system that uses sponge conductors infused with saline  
477 solution. While the use of dry electrodes has been observed in pilot and prototype studies of  
478 BCI-hand robot systems [52,49,78,87] and other motor imagery experiments [99–102], no  
479 dry EEG system was used in the final 30 studies that tested healthy or stroke participants. It is  
480 expected that as dry EEG systems continue to improve, their use in clinical studies of BCI  
481 will also become increasingly prominent.

482

483 The degree of BCI-robotic control for the majority of the studies (N=26) was limited to  
484 triggering the device to perform grasping (opening and closing of hand) and pinching (a  
485 thumb-index finger pinch or a 3-point thumb-index-middle finger pinch) movements using  
486 MI and other techniques. This means that no robotic control setup among the screened studies  
487 were able to perform digit-specific MI. This is a limitation caused by the non-invasive setup

488 of EEG and is due to the low spatial resolution brought by the distances between electrodes  
489 [103]. The homunculus model, a representation of the human body in the motor strip, maps  
490 the areas of the brain where activations have been reported to occur for motor processes. The  
491 challenge of decoding each finger digit MI in one hand is that they only tend to occupy a  
492 small area in this strip. Hence even the highest resolution electrode placement system (i.e.,  
493 the five percent or 10-5 system – up to 345 electrodes) would have difficulties accounting for  
494 digit-specific MI for BCI. In contrast to EEG, electrocorticography (ECoG) have been used  
495 to detect digit-specific MI. The electrodes of ECoG come in contact directly with the motor  
496 cortex and is an invasive procedure; making it non-ideal for use in BCI therapy [104]. It is  
497 worth noting however that some studies were successful in implementing continuous control  
498 based on ERD/ERS patterns: Bundy et al. [62] and Norman et al. [67] were able to apply  
499 continuous control of a 3-DOF pinch-grip exoskeleton based on spectral power while Bauer  
500 et al. [82] provided ERD-dependent control of finger extension for an end-effector robot.  
501 These continuous control strategies have been shown to be very useful in BCI-hand robots for  
502 assistive applications (i.e., partial or full device dependence for performing ADL tasks [105]).  
503 Whether this type of control can significantly improve stroke recovery is still in question as  
504 the strategy of robots for stroke rehabilitation can be more classified as a therapeutic  
505 “exercise” device.

506

507 Signal processing and machine learning play a vital role in the development of any EEG-  
508 based BCI. The pre-processing techniques (e.g., filtering, artefact removal), types of features  
509 computed from EEG, and the classifier used in machine learning can significantly affect the  
510 performance of the robotic system in classifying the user’s intent via MI [106]. This  
511 systematic review has revealed that approaches to develop MI EEG-based BCI are highly  
512 diverse in nature, which makes it difficult to compare across the systems and hinders the

513 development of new BCI systems informed by the strengths and weaknesses of existing state-  
514 of-the-art systems. The diversity in the design process can be beneficial to develop complex  
515 MI EEG-based BCI systems to achieve high efficiency and efficacy. However, such newly  
516 developed systems should be open sourced and easily reproducible by the research  
517 community to provide valid performance comparisons and drive forward the domain of  
518 robotic-assisted rehabilitation.

519

520 In addition to MI, other strategies for robotic control were reported. Diab et al. [88] and King  
521 et al. [89] both facilitated the movements of their respective orthoses by physical practice  
522 while Stan et al. [79] utilised a P-300 evoked potential speller BCI, where the user visually  
523 focused on a single alphanumeric character situated in a grid. The chosen character then  
524 corresponded to a command for the hand orthosis thereby producing the desired stimulus for  
525 the patient. While the latter study reported 100% accuracy rate in terms of intention and  
526 execution, the EEG channels were situated in the visual cortex rather than the motor strip  
527 which deviates from the goal of stimulating the desired brain region for plasticity.

528

529 In order to facilitate hand MI and account for significant time-points in the EEG data, all the  
530 studies employed a cue-feedback strategy during their trials. 19 of the studies presented a  
531 form of visual cue while the rest, except for two unspecified [69,87], involved cues in  
532 auditory (“bleep”) [76,80–83], textual [78,79,89] or verbal [88] forms. As for the provision of  
533 a matching sensory feedback, 16 studies presented a combination of kinaesthetic and visual  
534 feedback with some also providing auditory feedback during successful movement attempts.  
535 All the studies provided kinaesthetic feedback through their robotic devices. Some systems  
536 with visual feedback, such as Wang et al. [68], Li et al. [73], Chowdhury et al. in both of their  
537 clinical studies [63,64] and Ono et al. in their clinical [66] and pilot testing experiments [85],

538 used a video of an actual hand performing the desired action. Ang et al. [60] and Stan et al.  
539 [79], in a different strategy, provided visual feedback through photo manipulation and textual  
540 display, respectively. While the latter two studies reported promising results (with Ang et al.  
541 in RCT stage and Stan et al. having 100% classification accuracy), it should also be  
542 considered that such cue and feedback types (including Graz visualisations and auditory  
543 forms) are non-representative of hand movement and may not provide the same stimulation  
544 as a geometrical representation of a hand moving its desired course. This may be essential  
545 when we base principles of stroke recovery in alignment with how MI correlates with AO –  
546 an underlying theme of the motor simulation theory proposed by Jeannerod [15]. Figure 4  
547 shows how different kinds of visual cue and feedback can be presented to participants to help  
548 facilitate MI.  
549

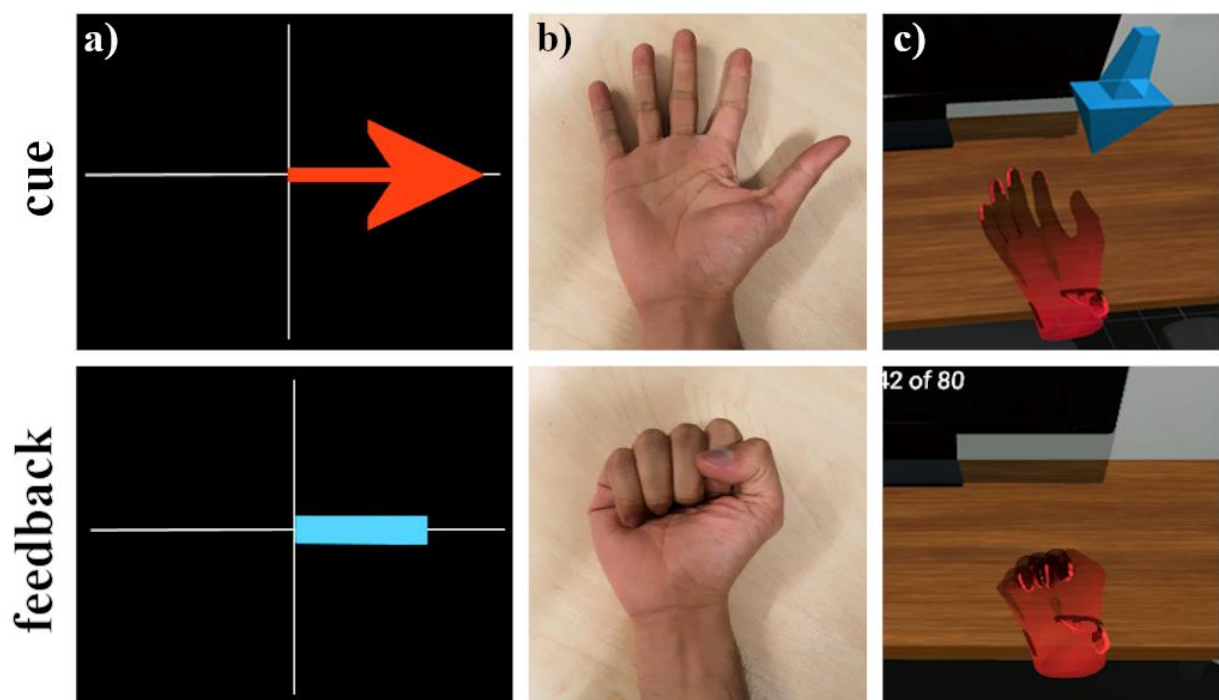

550

551 **Figure 4. Visual cue and feedback during MI trials in different conditions. (a) Graz MI**  
552 **visualisations, (b) video recordings of hand movement and (c) virtual hand**  
553 **representation through VR/AR**

## 554 **Future Directions**

555 There is clearly great potential for the use of BCI-hand robots in the rehabilitation of an  
556 affected hand following stroke. Nevertheless, it is important to emphasise that there is  
557 currently no solid evidence to support the use of such systems within clinical settings.  
558 Moreover, the purported benefits of these systems rest on conjectures that require empirical  
559 evidence. In other words, there are grounds for supposing that MI could be useful within  
560 these rehabilitation settings but no supporting evidence. This systematic review has also  
561 revealed that there are a number of technological limitations to existing BCI-hand robotic  
562 systems. We stress an urgent need to address these limitations to ensure that the systems meet  
563 the minimum required levels of product specification (in measuring brain activity, processing  
564 signals, delivering forces to the hand and providing rich feedback and motivating settings).  
565 We question the ethics or usefulness of conducting clinical trials with such systems until they  
566 can demonstrate minimum levels of technological capability. We consider below what  
567 standards these systems should obtain before subjecting them to a clinical trial and discuss  
568 might constitute an acceptable standard for a clinical trial.

569

## 570 **Ideal Setup for a BCI-hand Robot**

571 We summarise the information revealed via the systematic review about what constitutes an  
572 acceptable setup for a BCI-hand robot for stroke rehabilitation. We focus on improving  
573 individual components in data acquisition, data processing, the hand rehabilitation robot, and  
574 the visual cue and feedback environment. Table 6 presents the features and specifications of a  
575 fully integrated acceptable system.

576 **Table 6. Exemplary Features and Specifications of Future BCI-Hand Robot Systems**

577

| Component                            | Features and Specifications                                                                                                                                                                                                                                                                                                                                                                                                                             |
|--------------------------------------|---------------------------------------------------------------------------------------------------------------------------------------------------------------------------------------------------------------------------------------------------------------------------------------------------------------------------------------------------------------------------------------------------------------------------------------------------------|
| Data Acquisition System and Software | <ul style="list-style-type: none"> <li>• Dry EEG system with 8-16 channels, comfortable and easy to use</li> <li>• Inclusion of other bio-signal sensors such as EMG, EOG, force, accelerometers to remove artefacts and improve classification</li> <li>• Robust and reliable signal processing software: machine learning-based algorithms that discriminate brain states such as MI or evoked potentials and have lower calibration times</li> </ul> |
| Hand Robot                           | <ul style="list-style-type: none"> <li>• Safe, comfortable and aligned with the hand’s range of motion</li> <li>• Effective in providing kinaesthetic feedback</li> <li>• Use of back-drivable or soft actuators that effectively assist movement without additional injury</li> <li>• Multiple levels of safety and emergency features (mechanical, electronic, software), clear and obvious operation</li> </ul>                                      |
| Visual Cue and Feedback              | <ul style="list-style-type: none"> <li>• Provide rich visual cue and feedback to intended tasks, geometric representation of the hand (video or simulated environment), can be in multiple platforms such as display monitors or VR/AR headsets</li> <li>• Gamification of therapy exercises to provide an engaging regime to stroke patients</li> </ul>                                                                                                |

578

579

580 The implementation of these features in an ideal BCI-robot setup needs to be weighed against  
581 socioeconomic factors in healthcare delivery for it to be considered market ready. An ideal  
582 BCI system should provide above chance-level classification (>60%) after the first session on  
583 the first day of therapy. Ideally, the classification algorithm should also translate to following  
584 sessions or days; reducing the number of training sessions and focusing on the main therapy  
585 tasks. An alternative approach is to focus on making the setup an engaging experience. In  
586 other words, the delivery of intervention can be started immediately the patient wears the  
587 EEG cap and runs the BCI system. For the hand robot system, more straightforward criteria

588 can be followed with the existence of the numerous design protocols, regulation standards  
589 and assessment matrices mentioned in this review. Nevertheless, end-user involvement in the  
590 design with the prioritisation of safety while allowing the most natural hand movement and  
591 ROM as possible is the recommended goal.

592

### 593 **Ideal Setup for Clinical Trials**

594 We also propose a set of specialised criteria for BCI-hand robot systems in addition to the  
595 standard motor improvement scores (e.g. ARAT, FMMA) evaluated during clinical trials.  
596 Firstly, classification accuracies between intended and interpreted actions from the data  
597 acquisition and software component should always be accounted to track the effectiveness of  
598 BCI in executing the clinical task. In addition to this, system calibration and training  
599 procedures, especially its duration, should be detailed in the protocol to document the  
600 reliability of the classification algorithm. There is not much to consider in the use of robotic  
601 devices as they are most likely to be mature (if not yet commercially available) before being  
602 used as the hardware component in the study. However, the devices' functionality (i.e., task  
603 to be performed, degree of control and motion, actuation and power transmission etc.) should  
604 always be stated as they contribute to the evaluation of interactions between other  
605 components in the system. Lastly, controls for the clinical study must always be included,  
606 even with small-scale patient studies. As discussed in this article, these controls may be in the  
607 form of sham, standard arm therapy (SAT), standard robotic therapy, congruency feedback  
608 and quality of stimuli among others. Having regarded and implemented these criteria would  
609 help homogenise the clinical data for future meta-analyses, strengthen evidence-based results  
610 and provide a reliable way of documentation for individual and/or interacting components.

611 **Proposed roadmap**

612 We suggest that the immediate focus for BCI-controlled robotic device research should be  
613 around the engineering challenges. It is only when these challenges have been met that it is  
614 useful and ethical to subject the systems to clinical trials. We recommend that the challenges  
615 be broken down into the following elements: (1) data acquisition; (2) signal processing and  
616 classification; (3) robotic device; (4) priming and feedback environment; (5) integration of  
617 these four elements. The nature of these challenges means that a multidisciplinary approach is  
618 required (e.g. the inclusion of psychologists, cognitive neuroscientists and physiologists to  
619 drive the adoption of reliable neural data acquisition). It seems probable that progress will be  
620 made by different laboratories tackling some or all of these elements and coordinating  
621 information sharing and technology improvements. Once the challenges have been met (i.e.  
622 there is a system that is able to take neural signals and use these to help drive a robotic  
623 system capable of providing appropriate forces to the hand within a motivating environment)  
624 then robust clinical trials can be conducted to ensure that the promise of this approach does  
625 translate into solid empirical evidence supporting the use of these systems within clinical  
626 settings.



## 627 **Conclusions**

628 Research on BCI-controlled robotic devices for hand rehabilitation after stroke is a rapidly  
629 growing field and is gaining traction in the academic and medical research communities. The  
630 three main objectives of this systematic review were: (1) to survey how BCI technologies are  
631 utilised in controlling robotic devices for hand rehabilitation, (2) to determine the state-of-  
632 the-art developments in BCI systems in terms of hand MI resolution and degree of robotic  
633 control, and (3) to assess the clinical significance of BCI-hand robot systems by accounting  
634 clinical studies with outcome measures relating to motor recovery. Here, we were able to  
635 address these three and provide insight on the future of BCI-controlled robotics for stroke  
636 therapy.

637

638 We surveyed 30 EEG-based BCI-hand robot systems designed for stroke with majority of the  
639 studies (N=19) in their prototype development and pilot testing stages having TRL scores of  
640 3-4. The rest of the studies (N=11) involved a clinical component into it, having tested on  
641 stroke patients. The systems used in the clinical group were rated with the highest  
642 technological readiness: TRL 7 for two studies undergoing RCT. Profiling the EEG  
643 acquisition systems confirmed the still dominance of standard EEG systems that uses “wet”  
644 electrodes over the recent dry electrode systems. However, as the latter’s technology  
645 continues to improve in the next years, we may see a positive shift towards these techniques  
646 in terms of usage and preference. The common goal among these studies is to successfully  
647 discriminate and with high accuracy a user’s intent via motor imagery. While most have  
648 reported reliable, above chance-level accuracy rates, we observe the limitations evident in  
649 hand motor imagery resolution (e.g., intention to grasp or pinch as opposed to rest,  
650 discriminating from left and right movement, signal processing techniques) and the degree of  
651 robotic control (i.e., triggering and continuous control). The task designs, cues and matching

652 sensory feedback modes play an important role in motor imagery ability. We give attention to  
653 the inferior visual stimuli presented in most of the trials and suggest the use of a rich and  
654 engaging one through the different immersive platforms such as Virtual Reality and  
655 Augmented Reality. We also report that the clinical adoption of BCI-hand robots is still in its  
656 infancy due to few studies reporting significant improvements in the functional recovery of  
657 stroke patients. We suggest the development of a standard protocol in assessing clinical  
658 outcomes as an effort to strengthen the argument that these systems are not only  
659 economically feasible but also viable and robust for the therapy of motor impairment post-  
660 stroke.

661

662 Finally, we recommend that future developers focus on end-user involvement in the early  
663 design stages, achieving the successful integration of the individual components and making  
664 the system as safe and cost-effective as possible without compromising on reliability and  
665 robustness. These steps should allow this promising technology to advance, be adopted by the  
666 stakeholders and improve the quality of life for stroke survivors.

## 667 **List of Abbreviations**

|     |       |                                            |
|-----|-------|--------------------------------------------|
| 668 | ADL   | Activities of Daily Living                 |
| 669 | ANN   | Artificial Neural Network                  |
| 670 | AO    | Action Observation                         |
| 671 | AR    | Augmented Reality                          |
| 672 | ARAT  | Action Research Arm Test                   |
| 673 | BCI   | Brain-Computer Interface                   |
| 674 | BMI   | Brain-Machine Interface                    |
| 675 | CDRH  | Center for Devices and Radiological Health |
| 676 | CSD   | Covariate Shift Detection                  |
| 677 | CSP   | Common Spatial Pattern                     |
| 678 | DC    | Direct Current                             |
| 679 | ECoG  | Electrocorticography                       |
| 680 | EEG   | Electroencephalography                     |
| 681 | EMG   | Electromyography                           |
| 682 | EOG   | Electrooculography                         |
| 683 | ERD   | Event-Related Desynchronisation            |
| 684 | ERP   | Event-Related Potential                    |
| 685 | ERS   | Event-Related Synchronisation              |
| 686 | ERSP  | Event-Related Spectral Perturbation        |
| 687 | FBCSP | Filter Bank Common Spatial Pattern         |
| 688 | FIR   | Finite Impulse Response                    |
| 689 | FMMA  | Fugl-Meyer Motor Assessment                |
| 690 | GS    | Grip Strength                              |
| 691 | IIR   | Infinite Impulse Response                  |

|     |          |                                                                    |
|-----|----------|--------------------------------------------------------------------|
| 692 | LDA      | Linear Discriminant Analysis                                       |
| 693 | ME       | Motor Execution                                                    |
| 694 | MI       | Motor Imagery                                                      |
| 695 | PEDro    | Physiotherapy Evidence Database                                    |
| 696 | PMA      | Premarket Approval                                                 |
| 697 | PRISMA   | Preferred Reporting Items for Systematic Reviews and Meta-Analysis |
| 698 | PROSPERO | International Prospective Register of Systematic Reviews           |
| 699 | PS       | Pinch Strength                                                     |
| 700 | QSR      | Quality System Requirement                                         |
| 701 | RCT      | Randomised Clinical Trial                                          |
| 702 | SAT      | Standard Arm Therapy                                               |
| 703 | SVM      | Support Vector Machine                                             |
| 704 | TRA      | Technology Readiness Assessment                                    |
| 705 | TRL      | Technology Readiness Levels                                        |
| 706 | UK-MRC   | United Kingdom Medical Research Council                            |
| 707 | VR       | Virtual Reality                                                    |

## 708 **Declarations**

### 709 **Funding**

710 This work was supported by a Newton Fund PhD grant, ID 331486777, under the Newton-  
711 Agham partnership. The grant is funded by the UK Department for Business, Energy and  
712 Industrial Strategy and the Philippine Commission on Higher Education and delivered by the  
713 British Council. For further information, please visit [www.newtonfund.ac.uk](http://www.newtonfund.ac.uk).

714

### 715 **Availability of Data and Materials**

716 A full database of selected studies including those extracted during the search and selection  
717 process is available from the corresponding author on reasonable request.

718

### 719 **Authors' Contributions**

720 PDEB and ECS performed the initial search and screening of the studies. MA performed the  
721 analysis of signal processing techniques. AA, AEJ and RJH made contribution to the  
722 robotics, design and other engineering aspects of the current work. FM provided analysis  
723 related to EEG and BCI. MMW contributed to the clinical and overall direction of the review.  
724 PDEB, FM and MMW were the major contributors to the writing of the manuscript. All  
725 authors read and approved the final manuscript.

726

### 727 **Competing Interests**

728 The authors declare that they have no competing interests.

729

### 730 **Ethics Approval and Consent to Participate**

731 Not applicable.

732

733 **Consent for Publication**

734 Not applicable.

735

736 **Acknowledgements**

737 Not applicable.

## 738 **References**

- 739 1. McHugh G, Swain ID. A comparison between reported therapy staffing levels and the  
740 department of health therapy staffing guidelines for stroke rehabilitation: a national survey.  
741 BMC Health Services Research. 2014;14:216.
- 742 2. Ntsiea MV. Current stroke rehabilitation services and physiotherapy research in South  
743 Africa. S Afr J Physiother. 2019;75:475–475.
- 744 3. Manguerra MV, Baniqued PDE, Abad AC, Baldovino RG, Dungao JR, Bugtai NT. Active  
745 motor control for an upper extremity exoskeleton. Advanced Science Letters. 2018;24:9937–  
746 8840.
- 747 4. Graimann B, Allison B, Pfurtscheller G. Brain–computer interfaces: a gentle introduction.  
748 In: Graimann B, Pfurtscheller G, Allison B, editors. Brain-Computer Interfaces:  
749 Revolutionizing Human-Computer Interaction [Internet]. Berlin, Heidelberg: Springer Berlin  
750 Heidelberg; 2010. p. 1–27. Available from: [https://doi.org/10.1007/978-3-642-02091-9\\_1](https://doi.org/10.1007/978-3-642-02091-9_1)
- 751 5. Chang WH, Kim YH. Robot-assisted therapy in stroke rehabilitation. Journal of stroke.  
752 2013;15:174–81.
- 753 6. Jackson AE, Levesley MC, Makower SG, Cozens JA, Bhakta BB. Development of the  
754 iPAM MkII system and description of a randomized control trial with acute stroke patients.  
755 2013 IEEE 13th International Conference on Rehabilitation Robotics (ICORR). 2013. p. 1–6.
- 756 7. Hochberg LR, Serruya MD, Friehs GM, Mukand JA, Saleh M, Caplan AH, et al. Neuronal  
757 ensemble control of prosthetic devices by a human with tetraplegia. Nature. 2006;442:164.
- 758 8. Silvoni S, Ramos-Murguialday A, Cavinato M, Volpato C, Cisotto G, Turolla A, et al.  
759 Brain-computer interface in stroke: a review of progress. Clin EEG Neurosci. 2011;42:245–  
760 52.
- 761 9. Molteni F, Gasperini G, Cannaviello G, Guanziroli E. Exoskeleton and end-effector robots  
762 for upper and lower limbs rehabilitation: narrative review. PM&R. 2018;10:S174–88.
- 763 10. European Commission. Medical devices: guidance document - classification of medical  
764 devices [Internet]. United Kingdom Medicines and Healthcare products Regulation Agency;  
765 2016 [cited 2018 Dec 10]. Available from: [http://ec.europa.eu/growth/sectors/medical-](http://ec.europa.eu/growth/sectors/medical-devices/guidance/)  
766 [devices/guidance/](http://ec.europa.eu/growth/sectors/medical-devices/guidance/)
- 767 11. Guiochet J, Hoang QAD, Kaaniche M, Powell DJ. Applying existing standards to a  
768 medical rehabilitation robot: Limits and challenges. IROS. 2012.
- 769 12. Hardwick RM, Caspers S, Eickhoff SB, Swinnen SP. Neural correlates of action:  
770 comparing meta-analyses of imagery, observation, and execution. Neuroscience and  
771 Biobehavioral Reviews. 2018;31–44.
- 772 13. Xu L, Zhang H, Hui M, Long Z, Jin Z, Liu Y, et al. Motor execution and motor imagery:  
773 a comparison of functional connectivity patterns based on graph theory. Neuroscience.  
774 2014;261:184–94.

- 775 14. Sharma N, Baron JC. Does motor imagery share neural networks with executed  
776 movement: a multivariate fMRI analysis. *Front Hum Neurosci.* 2013;7:564–564.
- 777 15. Jeannerod M. Neural simulation of action: A unifying mechanism for motor cognition.  
778 *NeuroImage.* 2001;14:S103–9.
- 779 16. Mulder T. Motor imagery and action observation: cognitive tools for rehabilitation. *J*  
780 *Neural Transm (Vienna).* 2007;114:1265–78.
- 781 17. Vogt S, Di Rienzo F, Collet C, Collins A, Guillot A. Multiple roles of motor imagery  
782 during action observation. *Frontiers in Human Neuroscience.* 2013;7:807.
- 783 18. Friesen CL, Bardouille T, Neyedli HF, Boe SG. Combined Action Observation and Motor  
784 Imagery Neurofeedback for Modulation of Brain Activity. *Frontiers in Human Neuroscience.*  
785 2017;10:692.
- 786 19. Eaves DL, Riach M, Holmes PS, Wright DJ. Motor imagery during action observation: A  
787 brief review of evidence, theory and future research opportunities. *Frontiers in Neuroscience.*  
788 2016;10:514.
- 789 20. Kim T, Frank C, Schack T. A systematic investigation of the effect of action observation  
790 training and motor imagery training on the development of mental representation structure  
791 and skill performance. *Frontiers in Human Neuroscience.* 2017;11:499.
- 792 21. Li M, Xu G, Xie J, Chen C. A review: motor rehabilitation after stroke with control based  
793 on human intent. *Proc Inst Mech Eng H.* 2018;232:344–60.
- 794 22. Takahashi K, Domen K, Sakamoto T, Toshima M, Otaka Y, Seto M, et al. Efficacy of  
795 upper extremity robotic therapy in subacute poststroke hemiplegia: an exploratory  
796 randomized trial. *Stroke.* 2016;47:1385–8.
- 797 23. Fregni F, Pascual-Leone A. Hand motor recovery after stroke: tuning the orchestra to  
798 improve hand motor function. *Cogn Behav Neurol.* 2006;19:21–33.
- 799 24. Hallett M. Plasticity of the human motor cortex and recovery from stroke. *Brain Res*  
800 *Brain Res Rev.* 2001;36:169–74.
- 801 25. Zeiler SR, Krakauer JW. The interaction between training and plasticity in the poststroke  
802 brain. *Curr Opin Neurol.* 2013;26:609–16.
- 803 26. Mawase F, Uehara S, Bastian AJ, Celnik P. Motor learning enhances use-dependent  
804 plasticity. *J Neurosci.* 2017;37:2673–85.
- 805 27. Teplan M. Fundamentals of EEG measurement. *Measurement Science Review.* 2002;2.
- 806 28. Cohen MX. *Analyzing Neural Time Series Data: Theory and Practice* [Internet].  
807 Cambridge; 2014. Available from: <http://lib.ugent.be/catalog/rug01:002161004>
- 808 29. Pfurtscheller G, Lopes da Silva FH. Event-related EEG/MEG synchronization and  
809 desynchronization: basic principles. *Clin Neurophysiol.* 1999;110:1842–57.



- 810 30. Laver KE, Lange B, George S, Deutsch JE, Saposnik G, Crotty M. Virtual reality for  
811 stroke rehabilitation. *Cochrane Database Syst Rev*. 2017;11:CD008349–CD008349.
- 812 31. Brookes J, Warburton M, Alghadier M, Mon-Williams M, Mushtaq F. Studying human  
813 behavior with virtual reality: The Unity Experiment Framework. *Behavior Research Methods*  
814 [Internet]. 2019; Available from: <https://doi.org/10.3758/s13428-019-01242-0>
- 815 32. Vourvopoulos A, Cardona JEM, Badia SB i. Optimizing motor imagery neurofeedback  
816 through the use of multimodal immersive virtual reality and motor priming. 2015  
817 *International Conference on Virtual Rehabilitation (ICVR)*. 2015. p. 228–34.
- 818 33. Johnston M, Bonetti D, Joice S, Pollard B, Morrison V, Francis JJ, et al. Recovery from  
819 disability after stroke as a target for a behavioural intervention: Results of a randomized  
820 controlled trial. *Disability and Rehabilitation*. 2007;29:1117–27.
- 821 34. Hülsmann F, Frank C, Senna I, Ernst MO, Schack T, Botsch M. Superimposed Skilled  
822 Performance in a Virtual Mirror Improves Motor Performance and Cognitive Representation  
823 of a Full Body Motor Action. *Frontiers in Robotics and AI*. 2019;6:43.
- 824 35. Monge-Pereira E, Ibanez-Pereda J, Alguacil-Diego IM, Serrano JI, Spottorno-Rubio MP,  
825 Molina-Rueda F. Use of electroencephalography brain-computer interface systems as a  
826 rehabilitative approach for upper limb function after a stroke: a systematic review. *PM R*.  
827 2017;9:918–32.
- 828 36. Cervera MA, Soekadar SR, Ushiba J, Millan J d. R, Liu M, Birbaumer N, et al. Brain-  
829 computer interfaces for post-stroke motor rehabilitation: a meta-analysis. *bioRxiv* [Internet].  
830 2017; Available from: <http://biorxiv.org/content/early/2017/11/24/224618.abstract>
- 831 37. McConnell AC, Moioli RC, Brasil FL, Vallejo M, Corne DW, Vargas PA, et al. Robotic  
832 devices and brain-machine interfaces for hand rehabilitation post-stroke. *Journal of*  
833 *Rehabilitation Medicine*. 2017;49:449–60.
- 834 38. Fugl-Meyer AR, Jaasko L, Leyman I, Olsson S, Steglind S. The post-stroke hemiplegic  
835 patient. 1. a method for evaluation of physical performance. *Scand J Rehabil Med*.  
836 1975;7:13–31.
- 837 39. Lyle RC. A performance test for assessment of upper limb function in physical  
838 rehabilitation treatment and research. *International Journal of Rehabilitation Research*  
839 [Internet]. 1981;4. Available from:  
840 [https://journals.lww.com/intjrehabilres/Fulltext/1981/12000/A\\_performance\\_test\\_for\\_assess](https://journals.lww.com/intjrehabilres/Fulltext/1981/12000/A_performance_test_for_assessment_of_upper_limb.1.aspx)  
841 [ment\\_of\\_upper\\_limb.1.aspx](https://journals.lww.com/intjrehabilres/Fulltext/1981/12000/A_performance_test_for_assessment_of_upper_limb.1.aspx)
- 842 40. Matthews WB. Aids to the examination of the peripheral nervous system. *Journal of the*  
843 *Neurological Sciences*. 1977;33:299.
- 844 41. Office of the Director of Defense Research and Engineering Washington DC. Technology  
845 Readiness Assessment (TRA) Deskbook [Internet]. Fort Belvoir, VA, USA: Defense  
846 Technical Information Center; 2009 Jul. Report No.: ADA524200. Available from:  
847 <https://apps.dtic.mil/dtic/tr/fulltext/u2/a524200.pdf>
- 848 42. Maher CG, Sherrington C, Herbert RD, Moseley AM, Elkins M. Reliability of the PEDro  
849 scale for rating quality of randomized controlled trials. *Physical Therapy*. 2003;83:713–21.

- 850 43. PEDro Scale [Internet]. 1999 [cited 2018 Nov 30]. Available from:  
851 [www.pedro.org.au/english/downloads/pedro-scale/](http://www.pedro.org.au/english/downloads/pedro-scale/)
- 852 44. Belardinelli P, Laer L, Ortiz E, Braun C, Gharabaghi A. Plasticity of premotor cortico-  
853 muscular coherence in severely impaired stroke patients with hand paralysis. *Neuroimage*  
854 *Clin.* 2017;14:726–33.
- 855 45. Bergamasco M, Frisoli A, Fontana M, Loconsole C, Leonardis D, Troncossi M, et al.  
856 Preliminary results of BRAVO project: brain computer interfaces for Robotic enhanced  
857 Action in Visuo-motOr tasks. *IEEE Int Conf Rehabil Robot.* 2011;2011:5975377.
- 858 46. Broetz D, Braun C, Weber C, Soekadar SR, Caria A, Birbaumer N. Combination of brain-  
859 computer interface training and goal-directed physical therapy in chronic stroke: a case  
860 report. *Neurorehabil Neural Repair.* 2010;24:674–9.
- 861 47. Cincotti F, Pichiorri F, Arico P, Aloise F, Leotta F, de Vico Fallani F, et al. EEG-based  
862 brain-computer interface to support post-stroke motor rehabilitation of the upper limb. *Conf*  
863 *Proc IEEE Eng Med Biol Soc.* 2012;2012:4112–5.
- 864 48. George K, Iniguez A, Donze H, Kizhakkumthala S. Design, implementation and  
865 evaluation of a brain-computer interface controlled mechanical arm for rehabilitation. 2014  
866 IEEE International Instrumentation and Measurement Technology Conference (I2MTC)  
867 Proceedings. 2014. p. 1326–8.
- 868 49. Ushiba J, Morishita A, Maeda T. A task-oriented brain-computer interface rehabilitation  
869 system for patients with stroke hemiplegia. 2014 4th International Conference on Wireless  
870 Communications, Vehicular Technology, Information Theory and Aerospace & Electronic  
871 Systems (VITAE). 2014. p. 1–3.
- 872 50. Rathee D, Chowdhury A, Meena YK, Dutta A, McDonough S, Prasad G. Brain-machine  
873 interface-driven post-stroke upper-limb functional recovery correlates with beta-band  
874 mediated cortical networks. *IEEE Transactions on Neural Systems and Rehabilitation*  
875 *Engineering.* 2019;27:1020–31.
- 876 51. Naros G, Gharabaghi A. Physiological and behavioral effects of beta-tACS on brain self-  
877 regulation in chronic stroke. *Brain Stimul.* 2017;10:251–9.
- 878 52. Norman S. Brain computer interface design for robot assisted neurorehabilitation  
879 [Internet]. University of California, Irvine; 2017. Available from:  
880 <https://escholarship.org/uc/item/4v18v0d3>
- 881 53. Pellegrino G, Tomasevic L, Tombini M, Assenza G, Bravi M, Sterzi S, et al. Inter-  
882 hemispheric coupling changes associate with motor improvements after robotic stroke  
883 rehabilitation. *Restor Neurol Neurosci.* 2012;30:497–510.
- 884 54. Bousseta R, El Ouakouak I, Gharbi M, Regragui F. EEG based brain computer interface  
885 for controlling a robot arm movement through thought. *IRBM.* 2018;39:129–35.
- 886 55. Formaggio E, Storti SF, Boscolo Galazzo I, Gandolfi M, Geroi C, Smania N, et al.  
887 Modulation of event-related desynchronization in robot-assisted hand performance: brain  
888 oscillatory changes in active, passive and imagined movements. *J Neuroeng Rehabil.*  
889 2013;10:24.

- 890 56. Sarasola-Sanz A, Irastorza-Landa N, Lopez-Larraz E, Bibian C, Helmhold F, Broetz D, et  
891 al. A hybrid brain-machine interface based on EEG and EMG activity for the motor  
892 rehabilitation of stroke patients. *IEEE Int Conf Rehabil Robot*. 2017;2017:895–900.
- 893 57. Shiman F, Irastorza-Landa N, Sarasola-Sanz A, Spuler M, Birbaumer N, Ramos-  
894 Murguialday A. Towards decoding of functional movements from the same limb using EEG.  
895 *Conf Proc IEEE Eng Med Biol Soc*. 2015;2015:1922–5.
- 896 58. Muralidharan A, Chae J, Taylor DM. Extracting attempted hand movements from EEGs  
897 in people with complete hand paralysis following stroke. *Front Neurosci*. 2011;5:39.
- 898 59. Ono T, Mukaino M, Ushiba J. Functional recovery in upper limb function in stroke  
899 survivors by using brain-computer interface: a single case A-B-A-B design. *Conf Proc IEEE*  
900 *Eng Med Biol Soc*. 2013;2013:265–8.
- 901 60. Ang KK, Guan C, Phua KS, Wang C, Zhou L, Tang KY, et al. Brain-computer interface-  
902 based robotic end effector system for wrist and hand rehabilitation: results of a three-armed  
903 randomized controlled trial for chronic stroke. *Frontiers in neuroengineering*. 2014;7:30–30.
- 904 61. Barsotti M, Leonardis D, Loconsole C, Solazzi M, Sotgiu E, Procopio C, et al. A full  
905 upper limb robotic exoskeleton for reaching and grasping rehabilitation triggered by MI-BCI.  
906 2015 IEEE International Conference on Rehabilitation Robotics (ICORR). 2015. p. 49–54.
- 907 62. Bundy DT, Souders L, Baranyai K, Leonard L, Schalk G, Coker R, et al. Contralesional  
908 brain-computer interface control of a powered exoskeleton for motor recovery in chronic  
909 stroke survivors. *Stroke*. 2017;48:1908–15.
- 910 63. Chowdhury A, Raza H, Meena YK, Dutta A, Prasad G. Online covariate shift detection  
911 based adaptive brain-computer interface to trigger hand exoskeleton feedback for neuro-  
912 rehabilitation. *IEEE Transactions on Cognitive and Developmental Systems*. 2018;1–1.
- 913 64. Chowdhury A, Meena YK, Raza H, Bhushan B, Uttam AK, Pandey N, et al. Active  
914 physical practice followed by mental practice using BCI-driven hand exoskeleton: a pilot trial  
915 for clinical effectiveness and usability. *IEEE J Biomed Health Inform*. 2018;22:1786–95.
- 916 65. Frolov AA, Mokienko O, Lyukmanov R, Biryukova E, Kotov S, Turbina L, et al. Post-  
917 stroke rehabilitation training with a motor-imagery-based brain-computer interface (BCI)-  
918 controlled hand exoskeleton: a randomized controlled multicenter trial. *Frontiers in*  
919 *neuroscience*. 2017;11:400–400.
- 920 66. Ono Y, Tominaga T, Murata T. Digital mirror box: an interactive hand-motor BMI  
921 rehabilitation tool for stroke patients. 2016 Asia-Pacific Signal and Information Processing  
922 Association Annual Summit and Conference (APSIPA). 2016. p. 1–7.
- 923 67. Norman SL, McFarland DJ, Miner A, Cramer SC, Wolbrecht ET, Wolpaw JR, et al.  
924 Controlling pre-movement sensorimotor rhythm can improve finger extension after stroke.  
925 *Journal of Neural Engineering*. 2018;15:056026.
- 926 68. Wang X, Wong W, Sun R, Chu WC, Tong KY. Differentiated effects of robot hand  
927 training with and without neural guidance on neuroplasticity patterns in chronic stroke.  
928 *Frontiers in Neurology*. 2018;9:810.

- 929 69. Tsuchimoto S, Shindo K, Hotta F, Hanakawa T, Liu M, Ushiba J. Sensorimotor  
930 connectivity after motor exercise with neurofeedback in post-stroke patients with hemiplegia.  
931 *Neuroscience*. 2019;416:109–25.
- 932 70. Carino-Escobar RI, Carillo-Mora P, Valdes-Cristerna R, Rodriguez-Barragan MA,  
933 Hernandez-Arenas C, Quinzaños-Fresnedo J, et al. Longitudinal analysis of stroke patient'  
934 brain rhythms during an interview with a brain-computer interface. *Neural Plasticity*.  
935 2019;2019:11.
- 936 71. Cantillo-Negrete J, Carino-Escobar RI, Elias-Vinas D, Gutierrez-Martinez J. Control  
937 signal for a mechatronic hand orthosis aimed for neurorehabilitation. 2015 Pan American  
938 Health Care Exchanges (PAHCE). 2015. p. 1–4.
- 939 72. Chowdhury A, Raza H, Dutta A, Nishad SS, Saxena A, Prasad G. A study on cortico-  
940 muscular coupling in finger motions for exoskeleton assisted neuro-rehabilitation. *Conf Proc*  
941 *IEEE Eng Med Biol Soc*. 2015;2015:4610–4.
- 942 73. Li M, He B, Liang Z, Zhao CG, Chen J, Zhuo Y, et al. An attention-controlled hand  
943 exoskeleton for the rehabilitation of finger extension and flexion using a rigid-soft combined  
944 mechanism. *Frontiers in Neurorobotics*. 2019;13:34.
- 945 74. Zhang J, Wang B, Zhang C, Xiao Y, Wang MY. An EEG/EMG/EOG-based multimodal  
946 human-machine interface to real-time control of a soft robot hand. *Frontiers in Neurorobotics*.  
947 2019;13:7.
- 948 75. Randazzo L, Iturrate I, Perdakis S, Millán J d. R. mano: a wearable hand exoskeleton for  
949 activities of daily living and neurorehabilitation. *IEEE Robotics and Automation Letters*.  
950 2018;3:500–7.
- 951 76. Tacchino G, Gandolla M, Coelli S, Barbieri R, Pedrocchi A, Bianchi AM. EEG analysis  
952 during active and assisted repetitive movements: evidence for differences in neural  
953 engagement. *IEEE Trans Neural Syst Rehabil Eng*. 2017;25:761–71.
- 954 77. Coffey AL, Leamy DJ, Ward TE. A novel BCI-controlled pneumatic glove system for  
955 home-based neurorehabilitation. *Conf Proc IEEE Eng Med Biol Soc*. 2014;2014:3622–5.
- 956 78. Holmes CD, Wronkiewicz M, Somers T, Liu J, Russell E, Kim D, et al. IpsiHand Bravo:  
957 an improved EEG-based brain-computer interface for hand motor control rehabilitation. *Conf*  
958 *Proc IEEE Eng Med Biol Soc*. 2012;2012:1749–52.
- 959 79. Stan A, Irimia DC, Botezatu NA, Lupu RG. Controlling a hand orthosis by means of  
960 P300-based brain computer interface. 2015 E-Health and Bioengineering Conference (EHB).  
961 2015. p. 1–4.
- 962 80. Ramos-Murguialday A, Schürholz M, Caggiano V, Wildgruber M, Caria A, Hammer  
963 EM, et al. Proprioceptive feedback and brain computer interface (BCI) based  
964 neuroprostheses. *PLOS ONE*. 2012;7:e47048.
- 965 81. Ramos-Murguialday A, Birbaumer N. Brain oscillatory signatures of motor tasks. *J*  
966 *Neurophysiol*. 2015;113:3663–82.

- 967 82. Bauer R, Fels M, Vukelic M, Ziemann U, Gharabaghi A. Bridging the gap between motor  
968 imagery and motor execution with a brain-robot interface. *Neuroimage*. 2015;108:319–27.
- 969 83. Naros G, Naros I, Grimm F, Ziemann U, Gharabaghi A. Reinforcement learning of self-  
970 regulated sensorimotor beta-oscillations improves motor performance. *Neuroimage*.  
971 2016;134:142–52.
- 972 84. Vukelic M, Gharabaghi A. Oscillatory entrainment of the motor cortical network during  
973 motor imagery is modulated by the feedback modality. *Neuroimage*. 2015;111:1–11.
- 974 85. Ono Y, Wada K, Kurata M, Seki N. Enhancement of motor-imagery ability via combined  
975 action observation and motor-imagery training with proprioceptive neurofeedback.  
976 *Neuropsychologia*. 2018;114:134–42.
- 977 86. Witkowski M, Cortese M, Cempini M, Mellinger J, Vitiello N, Soekadar S. Enhancing  
978 brain-machine interface (BMI) control of a hand exoskeleton using electrooculography  
979 (EOG). *Journal of NeuroEngineering and Rehabilitation*. 2014;11:165.
- 980 87. Fok S, Schwartz R, Wronkiewicz M, Holmes C, Zhang J, Somers T, et al. An EEG-based  
981 brain computer interface for rehabilitation and restoration of hand control following stroke  
982 using ipsilateral cortical physiology. *Conf Proc IEEE Eng Med Biol Soc*. 2011;2011:6277–  
983 80.
- 984 88. Diab MS, Hussain Z, Mahmoud S. Restoring function in paralyzed limbs using EEG.  
985 2016 IEEE 59th International Midwest Symposium on Circuits and Systems (MWSCAS).  
986 2016. p. 1–4.
- 987 89. King CE, Wang PT, Mizuta M, Reinkensmeyer DJ, Do AH, Moromugi S, et al.  
988 Noninvasive brain-computer interface driven hand orthosis. *Conf Proc IEEE Eng Med Biol*  
989 *Soc*. 2011;2011:5786–9.
- 990 90. Kam JWY, Griffin S, Shen A, Patel S, Hinrichs H, Heinze HJ, et al. Systematic  
991 comparison between a wireless EEG system with dry electrodes and a wired EEG system  
992 with wet electrodes. *NeuroImage*. 2019;184:119–29.
- 993 91. Mathewson KE, Harrison TJJ, Kizuk SAD. High and dry? Comparing active dry EEG  
994 electrodes to active and passive wet electrodes. *Psychophysiology*. 2017;54:74–82.
- 995 92. Saab J, Battes B, Grosse-Wentrup M. Simultaneous EEG recordings with dry and wet  
996 electrodes in motor-imagery. In proceedings. Graz, Austria; 2011.
- 997 93. Lotte F, Guan C. Regularizing common spatial patterns to improve BCI designs: unified  
998 theory and new algorithms. *IEEE Transactions on Biomedical Engineering*. 2011;58:355–62.
- 999 94. Ang KK, Chin ZY, Wang C, Guan C, Zhang H. Filter bank common spatial pattern  
1000 algorithm on BCI competition IV datasets 2a and 2b. *Frontiers in neuroscience*. 2012;6:39–  
1001 39.
- 1002 95. Bobrov PD, Korshakov AV, Roshchin VI, Frolov AA. Bayesian classifier for brain-  
1003 computer interface based on mental representation of movements. *Zh Vyssh Nerv Deiat Im I*  
1004 *P Pavlova*. 2012;62:89–99.

- 1005 96. Oña ED, Cano-de la Cuerda R, Sanchez-Herrera P, Balaguer C, Jardon A. A review of  
1006 robotics in neurorehabilitation: Towards an automated process for upper limb. *J Healthc Eng.*  
1007 2018;
- 1008 97. Kersten P. Principles of physiotherapy assessment and outcome measures. *Physical*  
1009 *Management in Neurological Rehabilitation.* 2004. p. 29–46.
- 1010 98. Dovat L, Lamercy O, Ruffieux Y, Chapuis D, Gassert R, Bleuler H, et al. A haptic knob  
1011 for rehabilitation after stroke. 2006 IEEE/RSJ International Conference on Intelligent Robots  
1012 and Systems. Beijing, China: IEEE; 2006.
- 1013 99. Abdalsalam E, Yusoff MZ, Kamel N, Malik AS, Mahmoud D. Classification of Four  
1014 Class Motor Imagery for Brain Computer Interface. In: Ibrahim H, Iqbal S, Teoh SS,  
1015 Mustaffa MT, editors. 9th International Conference on Robotic, Vision, Signal Processing  
1016 and Power Applications. Springer Singapore; 2017. p. 297–305.
- 1017 100. Grummett TS, Leibbrandt RE, Lewis TW, De Los Angeles D, Powers DMW,  
1018 Willoughby JO, et al. Measurement of neural signals from inexpensive, wireless and dry EEG  
1019 systems. *Physiological Measurement.* 2015;36.
- 1020 101. Mladenov T, Kim K, Nooshabadi S. Accurate motor imagery based dry electrode brain-  
1021 computer interface system for consumer applications. 2012 IEEE 16th International  
1022 Symposium on Consumer Electronics. 2012. p. 1–4.
- 1023 102. Guger C, Krausz G, Edliner G. Brain-computer interface control with dry EEG  
1024 electrodes. *Proceedings of the 5th International Brain-Computer Interface Conference.* 2011.  
1025 p. 316–9.
- 1026 103. Srinivasan R. Methods to improve the spatial resolution of EEG. *International Journal of*  
1027 *Bioelectromagnetism.* 1999;1:102–11.
- 1028 104. Liao K, Xiao R, Gonzalez J, Ding L. Decoding individual finger movements from one  
1029 hand using human EEG signals. *PLOS ONE.* 2014;9:e85192.
- 1030 105. Johnson MJ, Micera S, Shibata T, Guglielmelli E. Rehabilitation and assistive robotics  
1031 [TC Spotlight]. *IEEE Robotics & Automation Magazine.* 2008;15:16–110.
- 1032 106. Arvaneh M, Guan C, Ang K, Quek C. Optimizing the Channel Selection and  
1033 Classification Accuracy in EEG-Based BCI. *Biomedical Engineering, IEEE Transactions on.*  
1034 2011;58:1865–73.

Table 2. Summary of Studies

| Authors                                  | Participants                                                                                                         | Study Design                                                                                                           | Task Design                                                                                                                                        | BCI-Hand Robot                                                                                                                                                                                                                       | Main Outcomes                                                                                                                                                                                                                                             |
|------------------------------------------|----------------------------------------------------------------------------------------------------------------------|------------------------------------------------------------------------------------------------------------------------|----------------------------------------------------------------------------------------------------------------------------------------------------|--------------------------------------------------------------------------------------------------------------------------------------------------------------------------------------------------------------------------------------|-----------------------------------------------------------------------------------------------------------------------------------------------------------------------------------------------------------------------------------------------------------|
| <b>Studies involving stroke patients</b> |                                                                                                                      |                                                                                                                        |                                                                                                                                                    |                                                                                                                                                                                                                                      |                                                                                                                                                                                                                                                           |
| Ang et al., 2014 [60]                    | N=27 (7F:14M)<br>Moderate to severe impairment of UE function<br>Mean age: 54.2y<br>Mean stroke duration: 385.1 days | 3-armed RCT of motor function with MI-BCI-device as intervention<br><br>Control groups: device only (Haptic Knob), SAT | Photo manipulation: hand opening and closing, pronation and supination<br><br>Cue: visual (photo)<br><br>Feedback: visual (photo) and kinaesthetic | EEG: 27 channels to classify ERD/ERS and coupled with EMG to confirm MI<br><br>Device: Haptic Knob, 2-DOF for hand grasping and knob manipulation<br><br>Actuation: DC brushed motors with linear belt drive<br><br>Control: trigger | Clinical outcome measure: FMMA Distal, improvement in weeks 3, 6, 12, 24<br><br>BCI-device group = 2.5±2.4, 3.3±2.3, 3.2±2.7, 4.2±3.1<br><br>Device only group = 1.6±2.5, 2.9±3.0, 2.5±2.6, 2.5±3.0<br><br>SAT group = 0.4±1.1, 1.9±1.9, 1.0±1.3, 0.3±2.1 |
| Barsotti et al., 2015 [61]               | N=3 (1F:2M)<br>Chronic stroke survivors with right arm hemiparesis<br>Mean age: 62±12y                               | Probing MI classification by BCI training, time-frequency analysis and robot trajectories<br><br>Uncontrolled          | Reaching-grasping-releasing<br><br>Cue: visual<br><br>Feedback: kinaesthetic<br><br>Minimum time required to perform MI = 2s                       | EEG: 13 channels to classify ERD<br><br>Device: BRAVO 2-DOF hand orthosis attached to full UE exoskeleton<br><br>Actuation: DC motors with rigid links<br><br>Control: trigger                                                       | Mean classification accuracy during BCI training = 82.51±2.04%<br><br>Average delay from visual cue to robot initiation = 3.45±1.6s<br><br>Average delay due to patient's ability to start MI = 1.45s                                                     |
| Bundy et al., 2017 [62]                  | N=10<br>Chronic hemiparetic stroke with moderate to severe UE hemiparesis<br>Mean age: 58.6±10.3y                    | Motor function evaluation before and after intervention by MI-BCI from unaffected hemisphere<br><br>Uncontrolled       | Opening of affected hand<br><br>Cue: visual<br><br>Feedback: visual and kinaesthetic                                                               | EEG: 8 channels to classify ERD<br><br>Device: 3-pinch grip, 1-DOF hand exoskeleton                                                                                                                                                  | Clinical outcome measure: ARAT Score, improvement from baseline to completion (12 weeks)<br><br>Mean ± SD = 6.20±3.81                                                                                                                                     |

|                                 |                                                                                                                                          |                                                                                                                                            |                                                                                                         |                                                                                                                                                                                                               |                                                                                                                                                                                                                                                                                            |
|---------------------------------|------------------------------------------------------------------------------------------------------------------------------------------|--------------------------------------------------------------------------------------------------------------------------------------------|---------------------------------------------------------------------------------------------------------|---------------------------------------------------------------------------------------------------------------------------------------------------------------------------------------------------------------|--------------------------------------------------------------------------------------------------------------------------------------------------------------------------------------------------------------------------------------------------------------------------------------------|
| Bundy et al. (cont'd)           |                                                                                                                                          |                                                                                                                                            |                                                                                                         | Control: continuous depending on spectral power                                                                                                                                                               | Note: 5.7 ARAT Score is the minimal clinically important difference in chronic stroke survivors                                                                                                                                                                                            |
| Carino-Escobar et al. 2019 [70] | N=9 (4F:5M)<br>Subacute ischaemic stroke<br>Mean age: 59.9±2.8y<br>Mean stroke duration: 158(±74)-185(±73) days                          | Determine longitudinal ERD/ERS patters and functional recovery with BCI-robot<br><br>Uncontrolled                                          | Extension-flexion of hand fingers<br><br>Cue: visual (Graz MI)<br><br>Feedback: visual and kinaesthetic | EEG: 11 channels to classify ERD/ERS<br><br>Device: hand finger orthosis<br><br>Actuation: DC motor with screw system for linear displacement, flexible links<br><br>Control: trigger                         | FMA-UE: N=3 reported equal or higher than 3 score gains, N=3 no score gains,<br><br>Mean longitudinal ERD/ERS: beta bands have higher association with time since stroke onset than alpha, and strong association with UL motor recovery                                                   |
| Chowdhury et al., 2018-b [63]   | N=20<br>10 healthy and 10 hemiplegic stroke patients<br>Mean age (healthy, stroke): 41±9.21y, 47.5±14.23y                                | Probe non-adaptive classifier (NAC) vs. Covariate Shift adaptive classifier (CSAC) of MI in EEG<br><br>Control group: healthy participants | Extension-flexion of hand fingers<br><br>Cue: visual<br><br>Feedback: visual and kinaesthetic           | EEG: 12 channels with EMG to classify ERD/ERS<br><br>Device: EMOHEX 3-finger, 3-DOF each, exoskeleton (thumb, index, middle)<br><br>Actuation: servomotors with rigid links<br><br>Control: trigger           | Mean classification accuracies during BCI training:<br><br>Healthy group: calibration = 78.50±9.01%, NAC = 75.25±5.46%, CSAC = 81.50±4.89%<br><br>Patient group: calibration = 79.63±13.11%, NAC = 70.25±3.43%, CSAC = 75.75±3.92%                                                         |
| Chowdhury et al., 2018-c [64]   | N=4 (2F:2M)<br>Hemiplegic stroke patients, right-handed, left hand impaired<br>Mean age: 44.75±15.69y<br>Mean stroke duration: 7 ±1.15mo | Motor function evaluation by using active physical practice followed by MI-BCI-controlled device intervention<br><br>Uncontrolled          | Extension-flexion of hand fingers<br><br>Cue: visual<br><br>Feedback: visual and kinaesthetic           | EEG: 12 channels with force sensors to classify ERD/ERS<br><br>Device: EMOHEX 3-finger, 3-DOF each, exoskeleton (thumb, index, middle)<br><br>Actuation: servomotors with rigid links<br><br>Control: trigger | Classification accuracies of 4 participants: P01 = 81.45±8.12%, P02 = 70.21±4.43%, P03 = 76.88±4.49%, P04 = 74.55±4.35%<br><br>Clinical outcome measures: GS and ARAT Scores, improvement from baseline to completion (6 weeks)<br><br>GS scores: group mean difference = +6.38 kg, p=0.06 |



|                                   |                                                                                                                                |                                                                                                                                          |                                                                                                                                                        |                                                                                                                                                                                                                                   |                                                                                                                                                                                                                                                                                                                                                                                                                |
|-----------------------------------|--------------------------------------------------------------------------------------------------------------------------------|------------------------------------------------------------------------------------------------------------------------------------------|--------------------------------------------------------------------------------------------------------------------------------------------------------|-----------------------------------------------------------------------------------------------------------------------------------------------------------------------------------------------------------------------------------|----------------------------------------------------------------------------------------------------------------------------------------------------------------------------------------------------------------------------------------------------------------------------------------------------------------------------------------------------------------------------------------------------------------|
| Chowdhury et al., 2018-c (cont'd) |                                                                                                                                |                                                                                                                                          |                                                                                                                                                        |                                                                                                                                                                                                                                   | ARAT scores: group mean difference = +5.66, p<0.05                                                                                                                                                                                                                                                                                                                                                             |
| Frolov et al., 2017 [65]          | N=74 (26F:48M)<br>BCI 55: Control 19<br>Subacute or chronic stroke with mild to hemiplegic hand paresis, right-handed          | Multi-centre RCT of MI-BCI-controlled hand exoskeleton<br>Control group: SHAM                                                            | 3 Tasks: (1) motor relaxation, (2) imagery of left-hand opening, (3) imagery of right-hand opening<br>Cue: visual<br>Feedback: visual and kinaesthetic | EEG: 30 channels to classify the three mental tasks by Bayesian classifier based on covariance matrices<br>Device: hand exoskeleton by Neurobotics, Russia<br>Actuation: pneumatic motors with spring flexors<br>Control: trigger | Mean classification accuracy during BCI training = 40.6%<br>Clinical outcome measures:<br>FMMA Distal and ARAT Scores, improvement in 10 days of training<br>FMMA Distal = 2.0, p<0.01 (BCI) and 1.0, p=0.046 (control)<br>ARAT Grasp = 3.0, p<0.01 (BCI) and 1.0, p=0.0394 (control)<br>ARAT Grip = 1.0, p<0.01 (BCI) and 1.0, p=0.045 (control)<br>ARAT Pinch = 1.0, p<0.01 (BCI) and 0.0, p=0.675 (control) |
| Norman et al., 2018 [67]          | N=8 (All male)<br>Cortical and subcortical single haemorrhagic or ischaemic stroke (at least 6 months)<br>Mean age: 59.5±11.8y | Implementation of sensorimotor rhythm (SMR) control on robot-assistive movement<br>Uncontrolled                                          | Extension of hand finger<br>Cue: visual<br>Feedback: visual and kinaesthetic                                                                           | EEG: 16 channels mapping SMR changes<br>Device: FINGER robot<br>Actuation: Linear servo-tube actuator with rigid links<br>Control: Visual - continuous (colour change respective to SMR), Robot - trigger                         | Mean classification accuracies:<br>8 participants: 83.1%, 76.3%, 73.3%, 68.2%, 74.5%, 86.5%, 47.9%, 40.0%<br>Box and blocks test (BBT):<br>At screening: mean score = 14.3±10.0, mean change after therapy = 4.3±4.5 (range 0-12). Higher score changes in participants who demonstrated SMR control but not significant (p=0.199)                                                                             |
| Ono et al., 2016-a [66]           | N=21 (9F:12M)<br>Chronic stroke patients with hemiplegic hands<br>Mean age: 57.9±2.4y                                          | Probe congruent vs. incongruent MI feedback strategies<br>Control groups: congruent (synchronous proprioceptive and visual feedback) and | Grasping of a tennis ball with a hand<br>Cue: visual (video of hand performing action)<br>Feedback: visual and kinaesthetic                            | EEG: 9 channels to classify ERD<br>Device: Power Assist Hand - Team ATOM, Atsugi, Japan                                                                                                                                           | Mean classification accuracies:<br>Congruent feedback = 56.8±5.2%, chance level=36.4±4.5%<br>Incongruent feedback = 40.0±3.5%, chance level 35.4±4.5%                                                                                                                                                                                                                                                          |

|                              |                                                                                                  |                                                                                                            |                                                                                                                       |                                                                                                                                   |                                                                                                                                                                                                                                |
|------------------------------|--------------------------------------------------------------------------------------------------|------------------------------------------------------------------------------------------------------------|-----------------------------------------------------------------------------------------------------------------------|-----------------------------------------------------------------------------------------------------------------------------------|--------------------------------------------------------------------------------------------------------------------------------------------------------------------------------------------------------------------------------|
| Ono et al., 2016-a (cont'd)  |                                                                                                  | incongruent (proprioceptive feedback given 1s after visual)                                                |                                                                                                                       | Actuation: pneumatic motors with rigid links<br>Control: trigger                                                                  |                                                                                                                                                                                                                                |
| Tsuchimoto et al., 2019 [69] | N=18 (3F:14M)<br>Chronic haemorrhagic or ischaemic stroke (from 2mo onwards)<br>Mean age: 58±10y | Implementation of MI-controlled robotic orthosis as neurofeedback<br>Control: SHAM                         | Extension of hand finger<br>Cue: unspecified<br>Feedback: kinaesthetic and electrical stimulation                     | EEG: 5 channels to classify MI<br>Device: robotic finger orthosis<br>Actuation: servo motors with rigid links<br>Control: trigger | Significant time-intervention interaction in the ipsilesional sensorimotor cortex. Higher coactivation of sensory and motor cortices for neurofeedback group in the ipsilesional sensorimotor cortices as compared to SHAM     |
| Wang et al., 2018 [68]       | N=24 (4F:20M)<br>Chronic stroke patients with paralysed hands<br>Mean age: 54±9y                 | Implementation of action observation and motor imagery (AO+MI) with kinaesthetic feedback<br>Control: SHAM | Hand grasping<br>Cue: visual (video of hand action / textual cues in SHAM group)<br>Feedback: visual and kinaesthetic | EEG: 16 channels to classify ERD<br>Device: robot hand<br>Control: Trigger                                                        | AO+MI with kinaesthetic feedback group showed significant improvements in FMA-UE across longitudinal evaluation [ $\chi^2(2) = 7.659, p = 0.022$ ], no significant difference in SHAM group [ $\chi^2(2) = 4.537, p = 0.103$ ] |

| Authors                                       | Participants                                          | Study Design                                                     | Task Design                                                     | BCI-Hand Robot                                                                                                                                                                                            | Main Outcomes                                                                                                                                                                                                                                                                                                                                                                               |
|-----------------------------------------------|-------------------------------------------------------|------------------------------------------------------------------|-----------------------------------------------------------------|-----------------------------------------------------------------------------------------------------------------------------------------------------------------------------------------------------------|---------------------------------------------------------------------------------------------------------------------------------------------------------------------------------------------------------------------------------------------------------------------------------------------------------------------------------------------------------------------------------------------|
| <b>Studies involving healthy participants</b> |                                                       |                                                                  |                                                                 |                                                                                                                                                                                                           |                                                                                                                                                                                                                                                                                                                                                                                             |
| Bauer et al., 2015 [71]                       | N=20 (11F:9M)<br>Right-handed<br>Mean age: 28.5±10.5y | Study on MI as compared to motor execution (ME) using BCI-device | Opening of left hand<br>Cue: auditory<br>Feedback: kinaesthetic | EEG: 31 channels to detect ERD, with EMG to classify MI from execution and account for tonic contraction<br>Device: Amadeo, Tyromotion, Austria<br>Control: discontinuation of ERD stops finger extension | Principal component analyses (between MI and execution) generated coefficients for the visual (VIS) and kinaesthetic (KIS) imagery scale, BCI-robot performance (BRI), tonic contraction task (MOC) and visuomotor integration task (VMI). VIS and KIS yielded high coefficients on MI while MOC and VMI yield high coefficients on ME. BRI show high coefficient yields on both MI and ME. |

|                                    |                                                     |                                                                                     |                                                                                                   |                                                                                                                                                                             |                                                                                                                       |
|------------------------------------|-----------------------------------------------------|-------------------------------------------------------------------------------------|---------------------------------------------------------------------------------------------------|-----------------------------------------------------------------------------------------------------------------------------------------------------------------------------|-----------------------------------------------------------------------------------------------------------------------|
| Cantillo-Negrete et al., 2015 [72] | N=1                                                 | Design and implementation of a MI-controlled hand orthosis                          | Extension-flexion of right-hand finger<br>Cue: visual (modified Graz)<br>Feedback: kinaesthetic   | EEG: 11 channels to detect MI<br>Device: 1-DOF hand finger orthosis<br>Actuation: DC motor with screw system for linear displacement, flexible links<br>Control: trigger    | Correctly classified trials = 78%                                                                                     |
| Chowdhury et al., 2015-a [73]      | N=6<br>Age range: 20-30y                            | Study of cortico-muscular coupling in robotic finger exoskeleton control            | Extension-flexion of hand fingers<br>Cue: visual<br>Feedback: kinaesthetic                        | EEG: 10 channels with EMG to classify MI<br>Device: 3-finger, 3-DOF each, exoskeleton (thumb, index, middle)<br>Actuation: servomotors with rigid links<br>Control: trigger | Mean classification accuracies: passive execution = 69.17%, hand execution = 71.25%, MI = 67.92%                      |
| Coffey et al., 2014 [74]           | N=3 (All male)<br>Right-handed<br>Age range: 24-28y | Design and implementation of a MI-controlled hand orthosis                          | Hand digit and wrist contraction and extension<br>Cue: visual (Graz MI)<br>Feedback: kinaesthetic | EEG: 27 channels to classify MI<br>Device: hand glove controlled by Arduino<br>Actuation: pneumatic<br>Control: trigger                                                     | Glove inflation-deflation cycle = 22s<br>Classification accuracies of 3 participants: A = 92.5%, B = 90.0%, C = 80.0% |
| Diab et al., 2016 [75]             | N=5                                                 | Design and implementation of EEG-triggered wrist orthosis with accuracy improvement | Hand opening and closing<br>Cue: verbal instruction<br>Feedback: kinaesthetic                     | EEG: 14 channels to detect hand movement-related EEG<br>Device: actuated Talon wrist orthosis<br>Actuation: linear<br>Control: trigger                                      | Mean classification accuracies: simulation studies = 95%, online BCI training = 86%                                   |

|                          |                                       |                                                                                                 |                                                                                                     |                                                                                                                                                                                                       |                                                                                                                                                                                                                   |
|--------------------------|---------------------------------------|-------------------------------------------------------------------------------------------------|-----------------------------------------------------------------------------------------------------|-------------------------------------------------------------------------------------------------------------------------------------------------------------------------------------------------------|-------------------------------------------------------------------------------------------------------------------------------------------------------------------------------------------------------------------|
| Fok et al., 2011 [76]    | N=4                                   | Design and implementation of a MI-controlled hand orthosis                                      | Hand opening and closing<br>Cue: unspecified<br>Feedback: visual (cursor movement) and kinaesthetic | EEG: 14 channels to detect MI-related ERD<br>Device: actuated Talon wrist orthosis<br>Actuation: linear actuator<br>Control: trigger                                                                  | EEG signals from imagined hand movement was correlated with the contralesional hemisphere and utilised to trigger the actuation of orthosis<br>ERD was detected from 12 Hz bin power of EEG during move condition |
| Li et al., 2019 [77]     | N=14 (4F:10M)<br>Mean age: 23.8±0.89y | Design and implementation of an attention-controlled hand exoskeleton with rigid-soft mechanism | Hand grasping<br>Cue: visual (video of hand action)<br>Feedback: kinaesthetic                       | EEG: 3 channels to map signals relative to attention<br>Device: hand exoskeleton<br>Actuation: linear actuator with rigid-soft mechanism<br>Control: Trigger                                          | Mean classification accuracy:<br>95.54% actuation success rate against the attention threshold                                                                                                                    |
| Holmes et al., 2012 [78] | N=6 (All male, young adults)          | Design and implementation of a MI-controlled hand orthosis                                      | Hand opening and closing<br>Cue: textual<br>Feedback: kinaesthetic                                  | EEG: 14 channels to detect hand movement-related EEG<br>Device: ExoFlex Hand Exoskeleton controlled by Arduino<br>Actuation: linear actuator connected to chained links that flex<br>Control: trigger | Classification accuracies of 6 participants: T001 = 95%, T002 = 98%, D001 = 91%, U001 = 93%, E001 = 87%, E002 = 86%                                                                                               |
| King et al., 2011 [79]   | N=1 (Female) 24y                      | Contralateral control of hand orthosis using EEG-based BCI                                      | Right hand idling and grasping<br>Cue: textual<br>Feedback: visual and kinaesthetic                 | EEG: 63 channels to control contralateral hand movement<br>Device: hand orthosis                                                                                                                      | Offline classification accuracy = 95.3±0.6%, $p < 3.0866 \times 10^{-25}$<br>Average lag from voluntary contractions to BCI-robot control = 2.24 ± 0.19s (after 5 sessions)                                       |

| King et al. (cont'd)    |                                       |                                                                                                                                                            |                                                                                                                                                               | Actuation: servomotors attached to Bowden cables as tendons                                                                                                 |                                                                                                                                                                                                                                                                                                                                                                                                                                       |
|-------------------------|---------------------------------------|------------------------------------------------------------------------------------------------------------------------------------------------------------|---------------------------------------------------------------------------------------------------------------------------------------------------------------|-------------------------------------------------------------------------------------------------------------------------------------------------------------|---------------------------------------------------------------------------------------------------------------------------------------------------------------------------------------------------------------------------------------------------------------------------------------------------------------------------------------------------------------------------------------------------------------------------------------|
| Naros et al., 2016 [80] | N=32 (16F:16M)<br>Mean age: 25.9±0.5y | 2x2 factorial design with parameters: adaptive classifier threshold and non-adaptive classifier threshold, contingent feedback and non-contingent feedback | Opening of right hand<br>Cue: auditory<br>Feedback: kinaesthetic                                                                                              | EEG: 32 channels to detect ERD, with EMG to classify MI (FC3, C3, CP3 used)<br>Device: Amadeo, Tyromotion, Austria<br>Control: trigger                      | Significant enhancement in group 1 (adaptive classifier + contingent feedback), p=0.0078<br>Significant reduction in group 4 (non-adaptive classifier + non-contingent feedback), p=0.0391<br>Motor performance improvement over baseline from first and last tasks, significant results:<br>Group 1 (adaptive classifier + contingent feedback), p=0.0313<br>Group 4 = (non-adaptive classifier + non-contingent feedback), p=0.0411 |
| Ono et al., 2018-b [81] | N=28<br>Right-handed except 1         | Implementation of an action observation strategy with visual and proprioceptive, or auditory feedback to MI<br>Control group: SHAM                         | Grasping of a tennis ball with a hand<br>Cue: visual (video of hand performing action)<br>Feedback: visual, kinaesthetic and auditory                         | EEG: 9 channels to classify ERD<br>Device: Power Assist Hand - Team ATOM, Atsugi, Japan<br>Actuation: pneumatic motors with rigid links<br>Control: trigger | AO+MI + proprioceptive and visual feedback:<br>Mean MI-ERD powers of correct feedback vs SHAM provide significant interaction, $F_{1,17}=6.618$ , p=0.020 (6 days)<br>Statistically significant increase in MI-ERD power in correct feedback group over baseline, p=0.012 (6 days)                                                                                                                                                    |
| Stan et al., 2015 [82]  | N=9                                   | Trigger a hand orthosis using a P300 speller BCI                                                                                                           | Spell E (enable), A (hand opening) and B (hand closing) in P300 speller BCI to perform hand grasping, moving and releasing objects<br>Cue: textual (spelling) | EEG: 8 channels focusing on visual cortex<br>Device: hand orthosis<br>Actuation: 2 servomotors and                                                          | Mean classification accuracies: 100% (on 6 <sup>th</sup> letter flash during calibration)                                                                                                                                                                                                                                                                                                                                             |

|                                            |                                                                                              |                                                                                                                                          |                                                                                                                                                                                |                                                                                                                                                                                              |                                                                                                                                                                                                                                 |
|--------------------------------------------|----------------------------------------------------------------------------------------------|------------------------------------------------------------------------------------------------------------------------------------------|--------------------------------------------------------------------------------------------------------------------------------------------------------------------------------|----------------------------------------------------------------------------------------------------------------------------------------------------------------------------------------------|---------------------------------------------------------------------------------------------------------------------------------------------------------------------------------------------------------------------------------|
| Stan et al. (cont'd)                       |                                                                                              |                                                                                                                                          | Feedback: visual (textual) and kinaesthetic                                                                                                                                    | current feedback circuitry<br>Control: trigger                                                                                                                                               |                                                                                                                                                                                                                                 |
| Ramos-Murguialday et al., 2012 [83]        | N=23<br>Mean age (contingent positive, contingent negative, SHAM): 26.6±4y, 26.5±5y, 26.2±2y | Probing MI with proprioceptive feedback<br>Experimental groups: contingent positive, contingent negative feedback<br>Control group: SHAM | 5 tasks: MI without direct control, MI with direct control, passive, active, rest<br>Cue: auditory<br>Feedback: visual and kinaesthetic                                        | EEG: 61 channels with EMG to classify ERD/ERS<br>Device: hand orthosis<br>Actuation: DC motor M-28 with a worm gearhead and Bowden cables for each finger<br>Control: trigger                | Contingent positive feedback provided higher BCI performance during MI without feedback than contingent negative and SHAM; and higher during MI with or without feedback as compared to rest                                    |
| Ramos-Murguialday and Birbaumer, 2015 [84] | N=9<br>Right-handed<br>Mean age: 26.6±4y                                                     | Detect oscillatory signatures of motor tasks during EEG                                                                                  | 5 tasks: MI without direct control, MI with direct control, passive, active, rest<br>Cue: auditory<br>Feedback: visual and kinaesthetic                                        | EEG: 61 channels with EMG to classify ERD/ERS<br>Device: hand orthosis<br>Actuation: DC motor M-28 with a worm gearhead and Bowden cables for each finger<br>Control: trigger                | Significant change in power in all frequency ranges during MI with direct control before trial initiation<br>Kinaesthetic feedback increased significant changes in alpha and beta power; therefore, increasing BCI performance |
| Randazzo et al., 2018 [85]                 | N=9 (2F:7M)<br>Mean age: 23±5y                                                               | Design and implementation of a hand orthosis with testing of kinaesthetic effects in EEG                                                 | 4 tasks: rest (REST), exoskeleton-induced hand motions (EXO), MI of right hand (MI), exoskeleton-induced hand motions plus MI (MIEXO)<br>Cue: visual<br>Feedback: kinaesthetic | EEG: 16 channels to detect MI<br>Device: mano hand exoskeleton<br>Actuation: linear servomotors attached to Bowden cables as tendons<br>Control: passive (exoskeleton not dependent on MI to | Mean classification accuracies among groups:<br>(vs REST) MI = 63.02±5.91%, EXO = 69.64±5.74%, MIEXO = 72.19±6.57%<br>MIEXO vs EXO = 69.91±9.86%<br>Chance level at 95% confidence = 58% (N=50 trials)                          |

| Randazzo et al.<br>(cont'd)       |                                                      |                                                                                          |                                                                                                                                                                                                                   | move during MIEXO task)                                                                                                                                                                                                                             |                                                                                                                                                                                                                                                                                      |
|-----------------------------------|------------------------------------------------------|------------------------------------------------------------------------------------------|-------------------------------------------------------------------------------------------------------------------------------------------------------------------------------------------------------------------|-----------------------------------------------------------------------------------------------------------------------------------------------------------------------------------------------------------------------------------------------------|--------------------------------------------------------------------------------------------------------------------------------------------------------------------------------------------------------------------------------------------------------------------------------------|
| Tacchino et al., 2017 [86]        | N=8 (7F:1M)<br>Right-handed<br>Mean age: 26.3±1.9y   | 2x2 factorial design with parameters: glove, no glove, active movement, passive movement | Opening and closing of hand, 4 tasks: (A) glove with active movement, (B) glove with passive movement, (C) no glove with active movement, (D) no glove and no movement<br>Cue: auditory<br>Feedback: kinaesthetic | EEG: 19 channels with EMG to detect ERD/ERS (C3, F3, Cz used)<br>Device: Gloreha hand rehabilitation glove<br>Actuation: electric actuators with Bowden cables on each finger<br>Control: passive (glove not dependent on brain-state during tasks) | Statistically significant ERD changes in beta and mu bands were observed to initiate earlier in tasks A and C (involves active movement)<br>Stronger and longer ERD was observed in tasks A and B (involves robotic assistance) suggesting reinforced afferent kinaesthetic feedback |
| Vukelic and Gharabaghi, 2015 [87] | N=11 (4F:7M)<br>Right-handed<br>Mean age: 25.83±3.1y | Assessment sensorimotor activity during MI with either visual or kinaesthetic feedback   | Right hand opening<br>Cue: visual (coloured cursor ball)<br>Feedback: visual and kinaesthetic (separated by experimental groups)                                                                                  | EEG: 128 channels to detect ERD/ERS during MI (F3, CP3, C3 used)<br>Device: Amadeo, Tyromotion, Austria<br>Control: trigger                                                                                                                         | MI + kinaesthetic feedback group resulted in higher beta ERS (p=0.02) during rest and higher beta ERD (p=0.04) during MI<br>Kinaesthetic feedback provides higher stability and sustained beta ERD activity than visual feedback                                                     |
| Witkowski et al., 2014 [88]       | N=12 (4F:8M)<br>Right-handed<br>Mean age: 28.1±3.63y | Assessment performance and safety of EEG-EOG hybrid BCI                                  | Right hand grasping<br>Cue: visual (coloured squares and arrows)<br>Feedback: kinaesthetic                                                                                                                        | EEG: 5 channels with EOG and EMG to detect ERD during MI<br>Device: HX hand exoskeleton<br>Actuation: DC motors with Bowden cables for thumb and index fingers<br>Control: trigger                                                                  | Mean classification accuracies:<br>EEG only = 63.59±10.81%<br>EEG/EOG hybrid = 60.77±9.42%<br>Mean safety criterion violations during rest:<br>EEG only = 45.91±26.8%<br>EEG/EOG hybrid = 10.14±0.3%                                                                                 |

|                            |                                                  |                                                                                             |                                                                                                                                                                           |                                                                                                                                                                          |                                                                                                             |
|----------------------------|--------------------------------------------------|---------------------------------------------------------------------------------------------|---------------------------------------------------------------------------------------------------------------------------------------------------------------------------|--------------------------------------------------------------------------------------------------------------------------------------------------------------------------|-------------------------------------------------------------------------------------------------------------|
| Zhang et al., 2019<br>[89] | N=6 (2F:4M)<br>Right-handed<br>Age range: 23-26y | Implementation of a multimodal system using EEG, EMG and EOG to control a soft-robotic hand | Graz visualisation and auditory instructions, eye movements and physical practice (hand gestures)<br>Cue: visual (Graz MI), auditory<br>Feedback: visual and kinaesthetic | EEG with EMG and EOG: 40 channels to analyse ERD/ERS patterns<br>Device: Soft pneumatic finger<br>Actuation: pneumatic actuator with soft structures<br>Control: trigger | Mean classification accuracies:<br>EOG = 94.23%<br>EEG = 31.46%<br>EMG = 36.38%<br>Multimodal = 93.83±0.02% |
|----------------------------|--------------------------------------------------|---------------------------------------------------------------------------------------------|---------------------------------------------------------------------------------------------------------------------------------------------------------------------------|--------------------------------------------------------------------------------------------------------------------------------------------------------------------------|-------------------------------------------------------------------------------------------------------------|

1036

1037 UE = Upper Extremity, MI = Motor Imagery, BCI = Brain-Computer Interface, RCT = Randomised Clinical Trial, SAT = Standard Arm Therapy,

1038 EMG = Electromyography, EOG = Electrooculography, ERD/ERS = Event-Related Desynchronisation/Synchronisation, FMMA = Fugl-Meyer Motor Assessment,

1039 ARAT = Action Research Arm Test, GS = Grip Strength, DOF = Degrees-of-Freedom
